# Supplementary material for: Adoptive cancer immunotherapy using DNA-demethylated T helper cells as antigen-presenting cells
Source: PubMed Central journal article supplement (PMC5840134; doi:10.1038/s41467-018-03217-9), 2018-03-06
Supplement: 41467_2018_3217_MOESM1_ESM.pdf [file 41467_2018_3217_MOESM1_ESM.pdf]

## Supplementary Information

Kirkin *et al.* Adoptive cancer immunotherapy using DNA-demethylated T helper cells as antigen-presenting cells

## Table of Contents

| Section                                                                                                                            | Page |
|------------------------------------------------------------------------------------------------------------------------------------|------|
| Supplementary Methods                                                                                                              | 4    |
| MRI                                                                                                                                | 4    |
| O-(2-[ <sup>18</sup> F]fluoroethyl)-L-tyrosine positron emission tomography (FET-PET) imaging                                      | 5    |
| Radiolabeling and scintigraphy of leukocytes (control) and cytotoxic lymphocytes                                                   | 6    |
| Safety and tolerability                                                                                                            | 7    |
| Supplementary Figure 1. Low induction of the stress proteins in DC-activated lymphocytes after 5-aza-CdR-treatment                 | 8    |
| Supplementary Figure 2. Derepression of CT antigens in DC-induced lymphocytes by 5-aza-CdR                                         | 9    |
| Supplementary Figure 3. Derepression of CT antigens measured by quantitative PCR (qPCR)                                            | 10   |
| Supplementary Figure 4. Duration of CT-antigen expression after induction by 5-aza-CdR                                             | 11   |
| Supplementary Figure 5. Derepression of CT antigens by 5-aza-CdR in CD4 <sup>+</sup> and CD8 <sup>+</sup> T cells.                 | 12   |
| Supplementary Figure 6. Specificity of the 57B monoclonal antibody (sandwich ELISA)                                                | 13   |
| Supplementary Figure 7. Immunoblot analysis of MAGE expression in 5-aza-CdR-treated DC-induced lymphocytes                         | 14   |
| Supplementary Figure 8. Demethylation of CT-antigen promoters in dendritic cell-induced lymphocytes                                | 15   |
| Supplementary Figure 9. Growth of PBLs and 5-aza-Cdr-treated TH cells cultured separately and in co-culture                        | 16   |
| Supplementary Figure 10. Recognition 5-aza-Cdr-treated CD4 <sup>+</sup> TH cells by cytotoxic lymphocytes                          | 17   |
| Supplementary Figure 11. Effect of a blocking antibody to HLA class I (W6/32) on CTL recognition of 5-aza-CdR-treated TH cells     | 18   |
| Supplementary Figure 12. CTL-mediated recognition of breast cancer cells and immortalized melanocytes (Mel-ST)                     | 19   |
| Supplementary Figure 13. Effect of a blocking antibody to HLA class I (W6/32) on CTL recognition of MDA-MB-231 breast cancer cells | 20   |
| Supplementary Figure 14. CTL-mediated lysis of MDA-MB-231 breast cancer cells                                                      | 21   |
| Supplementary Figure 15. Real-time monitoring of CTL-mediated cytotoxicity                                                         | 22   |

|                                                                                                                                                |    |
|------------------------------------------------------------------------------------------------------------------------------------------------|----|
| Supplementary Figure 16. Tumor-specific cell lysis of breast cancer cells                                                                      | 23 |
| Supplementary Figure 17. Immunohistochemical analysis of MAGE-A3 in glioblastoma biopsies at diagnosis                                         | 24 |
| Supplementary Figure 18. Flow diagram summarizing the trial flow and grounds for exclusion from the study                                      | 25 |
| Supplementary Figure 19. Transient changes in circulating lymphocyte, leukocyte and neutrophil counts after injection of cytotoxic lymphocytes | 26 |
| Supplementary Figure 20. Tumor response in Patient 20                                                                                          | 28 |
| Supplementary Figure 21. T cells at the previous tumor site in Patient 6 (autopsy material)                                                    | 29 |
| Supplementary Table 1. Proportion of CD4 <sup>+</sup> cells in non-adherent lymphocyte cultures after induction with mature DCs or PHA         | 30 |
| Supplementary Table 2. Expression of selected surface markers on NK and T cells in the final product                                           | 31 |
| Supplementary Table 3. Stimulatory activity of CD4 <sup>+</sup> and CD8 <sup>+</sup> cells after treatment with 5-aza-Cdr                      | 32 |
| Supplementary Table 4. Lysis of MEL-ST cells expressing single CT antigens by CD56-depleted cytotoxic lymphocytes                              | 33 |
| Supplementary Table 5. Baseline characteristics of glioblastoma patients (N = 25)                                                              | 34 |
| Supplementary Table 6. Expression of CTCFL and MAGE-A3 in diagnostic tumor biopsies (immunohistochemical analysis)                             | 35 |
| Supplementary Table 7. Induction of MAGE-antigen mRNA expression by 5-aza-CdR in TH cells from patients with glioblastoma                      | 36 |
| Supplementary Table 8. Cell therapy products administered in the phase 1 glioblastoma trial                                                    | 38 |
| Supplementary Table 9. Adverse events reported during the 20-week study period after first injection of therapeutic cells                      | 39 |
| Supplementary Table 10. Serious adverse events reported during the 20-week study period after first injection of therapeutic cells             | 40 |
| Supplementary Table 11. Additional injections of cytotoxic lymphocytes under approved compassionate use                                        | 41 |
| Supplementary Table 12. CT-antigen expression in cancer cell lines used in this study                                                          | 42 |
| Supplementary Table 13. Antibodies                                                                                                             | 43 |
| Supplementary Table 14. Primer sequences for RT-PCR                                                                                            | 44 |
| Supplementary Table 15. Primer sequences for bisulfite pyrosequencing                                                                          | 44 |
| Supplementary Table 16. Primer sequences for MS-MCA                                                                                            | 44 |
| Supplementary References                                                                                                                       | 45 |

## Supplementary Methods

**MRI.** The images were acquired on a 1.5 tesla MR unit (Siemens Magnetom Avanto syngo MR B17, Siemens Medical Systems, Erlangen, Germany). The MR imaging included the following sequences: 1) Pre-contrast MPR, sagittal T1 (TR/TE = 1930/2.92 ms), FoV 256 mm, slice thickness 1.00 mm, 2) Axial diffusion (TR/TE= 3400/102 ms), slice thickness 5.0 mm, average ADC maps, 3) Coronal TIRM, dark-fluid (TR/TE = 9000/77.0 ms), slice thickness 5.0 mm, 4) Axial T2 (TR/TE = 4000/107 ms), slice thickness 5.0 mm and post-contrast MPR as sequence 1). The contrast used was MultiHance® (Bracco S.p.A, Milano, Italy). A dose of 0.2 mL/kg body weight (maximum dose 15 mL) was administered intravenously as a bolus after acquisition of sequence 1-3. Qualitative assessment was performed for post-contrast T1 sequences only.

**O-(2-[<sup>18</sup>F]fluoroethyl)-L-tyrosine positron emission tomography (FET-PET) imaging.** A single frame static PET acquisition was performed 20 to 40 min p.i. of 200 MBq FET on a Biograph 64 Truepoint PET/CT-scanner (Siemens, Knoxville, USA). Images were attenuation and scatter corrected, and reconstructed with OSEM 3D (6 it, 16 sub, 5 mm Gauss). All patients fasted for at least 6 h before FET injection. FET PET images were co-registered to the post-contrast T1- and FLAIR/T2-weighted MRI. A background region of interest (ROI) was drawn in a healthy appearing cortical region in the unaffected hemisphere contralateral to the tumor. The tumor was auto-contoured in 3D to include voxels  $\geq 1.6 \times$  background according to established criteria<sup>1</sup> enabling the assay of tumor activity by the metabolically active tumor volume (FETvol), and the ratio between maximal tumor activity and background (Tmax/background).

**Radiolabeling and scintigraphy of leukocytes (control) and cytotoxic lymphocytes.**

Leukocytes were labeled with  $^{111}\text{In}$ -tropolone. In brief, 85 ml of venous blood was drawn and anticoagulated with citric acid–glucose. Methylcellulose (2% (w/v)) was added to the blood for faster sedimentation of erythrocytes. Cell-rich plasma was transferred to another tube and leukocytes were isolated by gradient centrifugation. Isolated leukocytes were resuspended in 1 ml of cell-free plasma and added to a mixture of 20–30 MBq of  $^{111}\text{InCl}_3$  and 0.1 ml of 0.0044 M tropolone. Following centrifugation, resuspension and quality control (labeling efficiency), a dose of 9–12 MBq of labeled leukocytes was injected intravenously within 1 h after labeling. Cytotoxic lymphocytes were labeled with  $^{111}\text{In}$ -tropolone and handled in a similar way as leukocytes, except that they were suspended in 1-2 ml of Plasma-Lyte (Baxter International, Deerfield, IL). In two patients, cytotoxic lymphocytes were labeled with  $^{99\text{m}}\text{Tc}$ -labeled hexamethylpropyleneamine oxime (HMPAO) using the same steps as described above except that the mixture added to the cells was 900-1100 MBq of  $^{99\text{m}}\text{Tc}$ -HMPAO (Ceretek, Garden Grove, CA, USA), and a dose of 150-200 MBq of labeled cells was injected intravenously. Whole body scintigraphy was obtained 2-4 h and 20–24 h and single-photon emission computed tomography / computed tomography (SPECT/CT) of the head was obtained 24 h after injection of the labeled cells using a SPECT/CT camera (Precedence, Philips, The Netherlands). SPECT images were attenuation and scatter corrected, and reconstructed with Astonish (4 it, 16 sub, Hanning). The scans were classified as negative, when no sites of abnormal uptake were observed, or as positive when at least 1 focus of abnormal uptake was observed. Uptake of an intracranial focus seen on SPECT/CT was compared to background in the contralateral area (tumor/background ratio). All positive foci were correlated to MRI and FET-PET scans to resolve whether a focal uptake was related to tumor (true positive) or unspecific uptake to non-tumor tissue (false positive).

**Safety and tolerability.** Blood pressure, pulse, and body temperature were measured 15 min, and 1, 4, 8, 12, 18, 24, 30, 36, 42 and 48 h after the first treatment and until 24 h after the second and third treatments. Karnofsky Performance Score was measured at weeks 4, 6, 9, 14 and 20. Blood samples were obtained at each admission and analyzed for leukocytes (differential count), C-reactive protein (CRP), hemoglobin, electrolytes, renal function, liver count (liver enzymes). Adverse events observed by the investigator, or spontaneously reported by the patient, were registered during the entire study period.

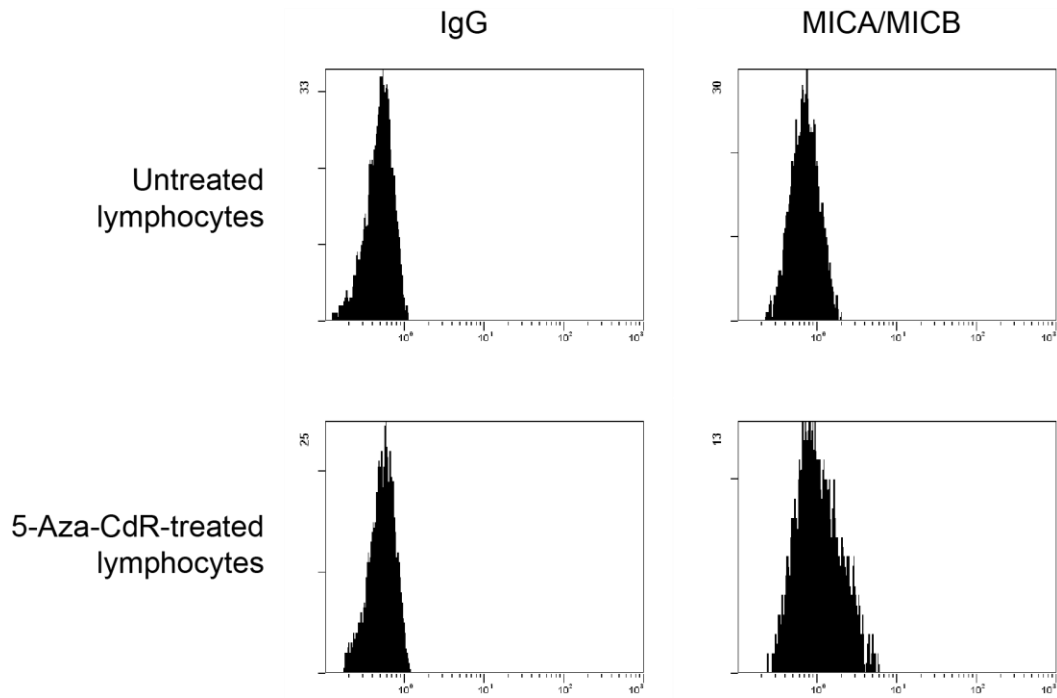

**Supplementary Figure 1. Low induction of the stress proteins in DC-activated lymphocytes after 5-aza-CdR treatment.**

A representative lymphocyte culture was grown for 6 days in the presence of fully mature DCs and treated by 10  $\mu$ M 5-aza-CdR for 2 days. Untreated lymphocytes were analyzed as control. Expression of MICA and MICB on these cells was assessed by flow cytometry.



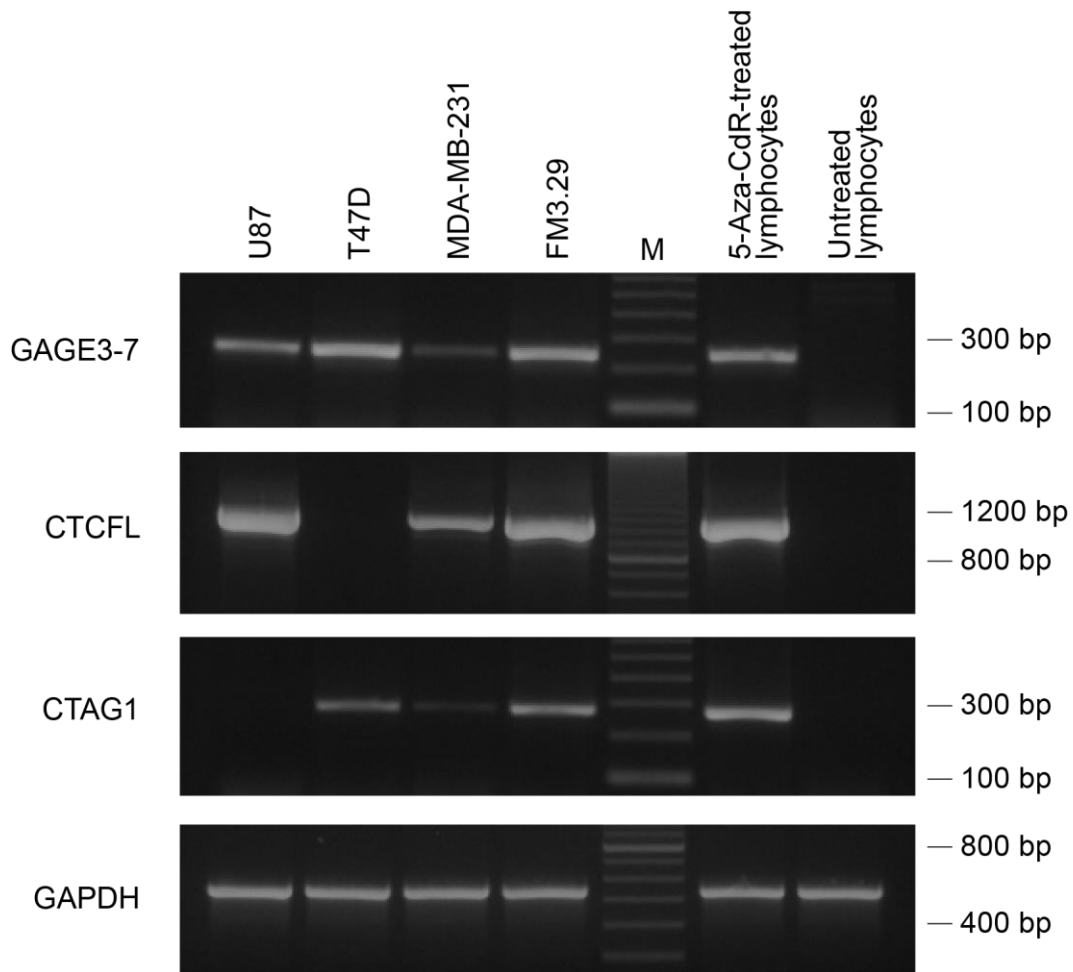

**Supplementary Figure 2. Derepression of CT antigens in DC-induced lymphocytes by 5-aza-CdR.**

DC-activated lymphocytes were treated with 10  $\mu$ M 5-aza-CdR for 2 days. Expression of GAGE, CTCFL (also known as BORIS) and CTAG1 (also known as NY-ESO-1) mRNA was analyzed by RT-PCR. GAPDH expression was analyzed as a control. T47D (breast cancer), MDA-MB-231 (breast cancer) and FM3.29 (melanoma) cells were included as examples of tumor cells expressing these CT antigens. M, 100-bp ladder.

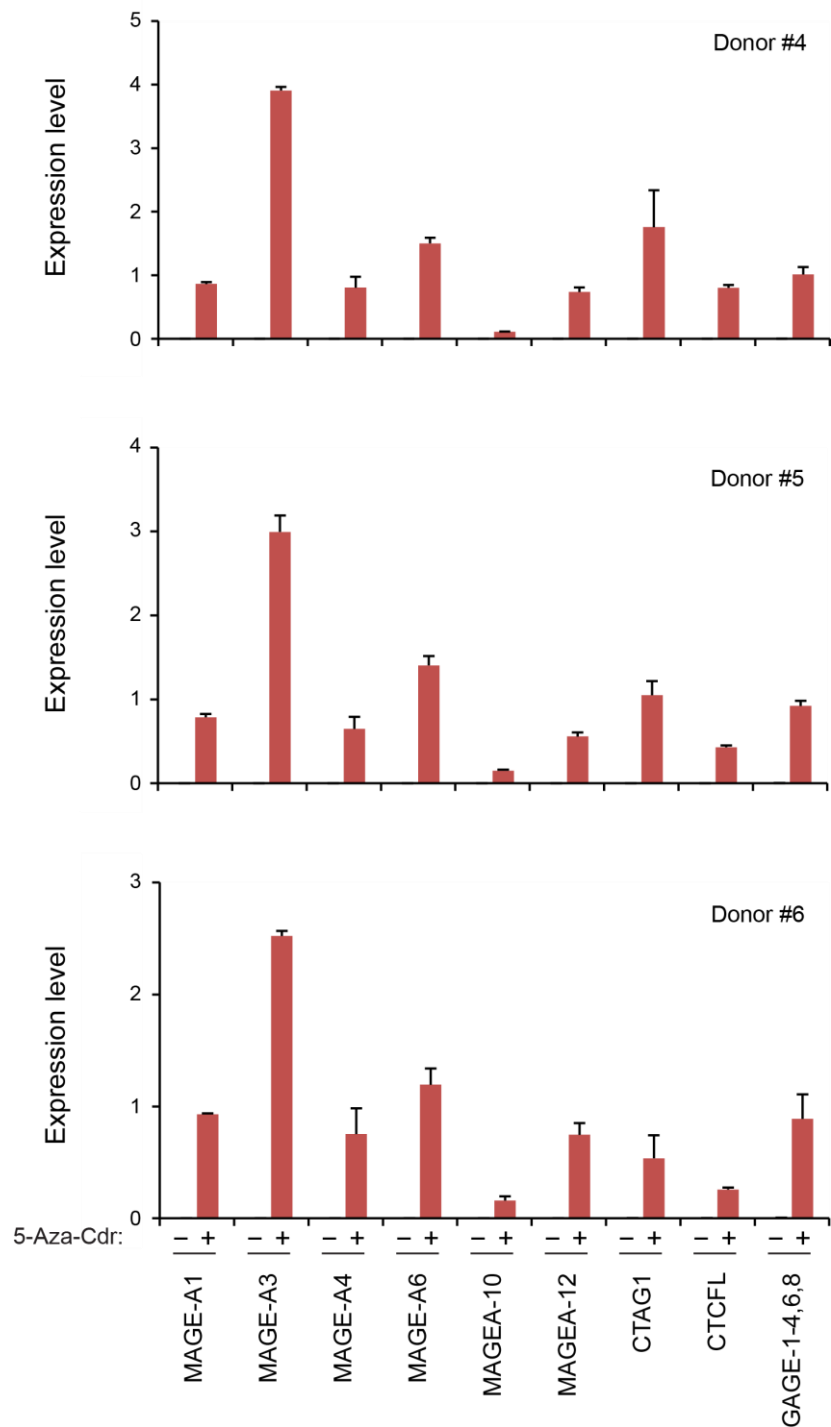

**Supplementary Figure 3. Derepression of CT antigens measured by quantitative PCR (qPCR).**

DC-activated lymphocyte cultures from three healthy donors were grown in the presence (+) or absence (-) of 10  $\mu$ M 5-aza-CdR for 2 days. Expression levels of CT-antigen mRNA were determined relative to GAPDH. Data of triplicates are presented as mean  $\pm$  s.d.

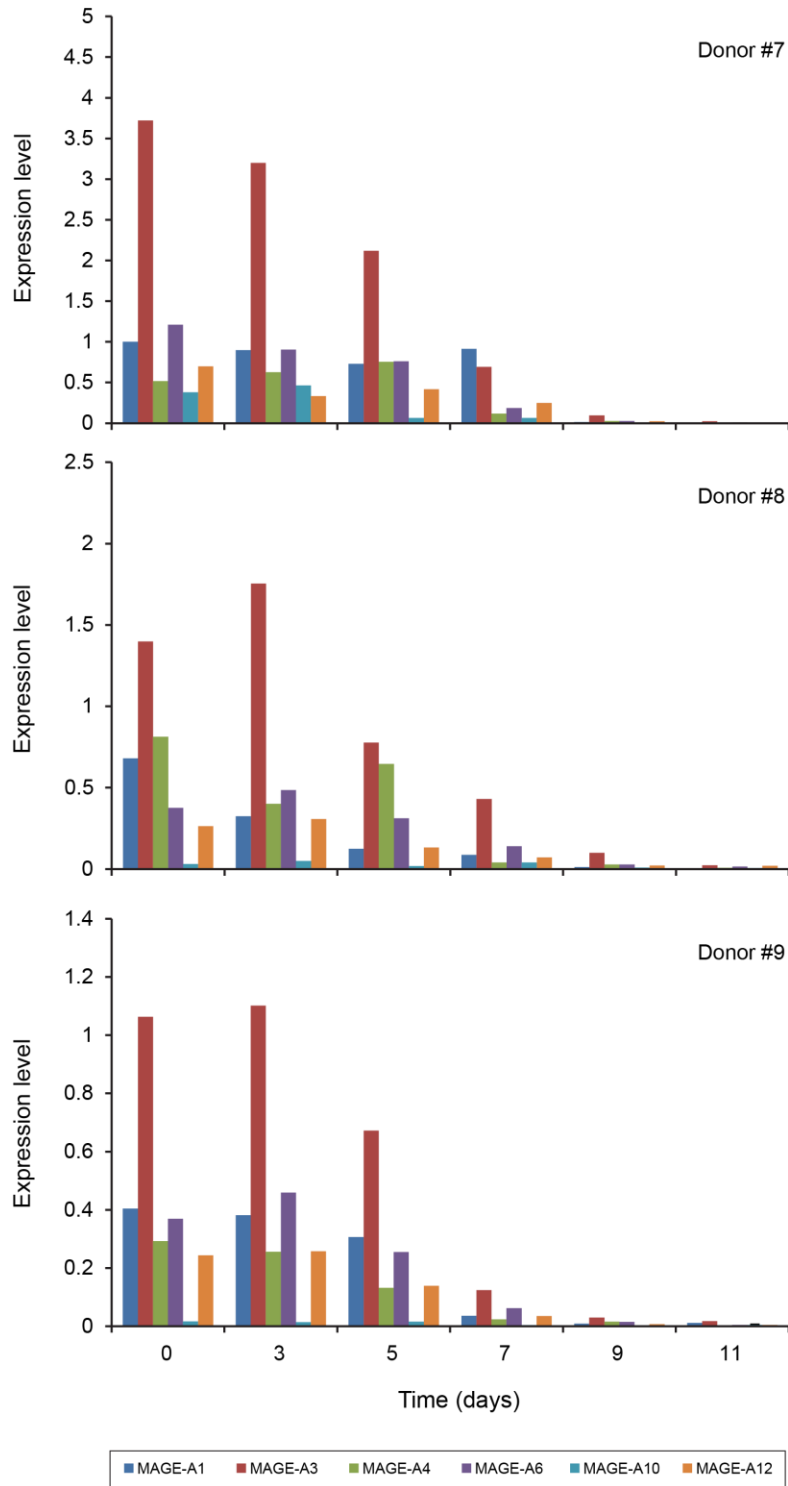

**Supplementary Figure 4. Duration of CT-antigen expression after induction by 5-aza-CdR.**

DC-activated lymphocyte cultures from three healthy donors were grown in the presence of 10  $\mu$ M 5-aza-CdR for 2 days. Post-5-aza-CdR treatment expression levels of CT-antigen mRNA were determined relative to GAPDH using qPCR.

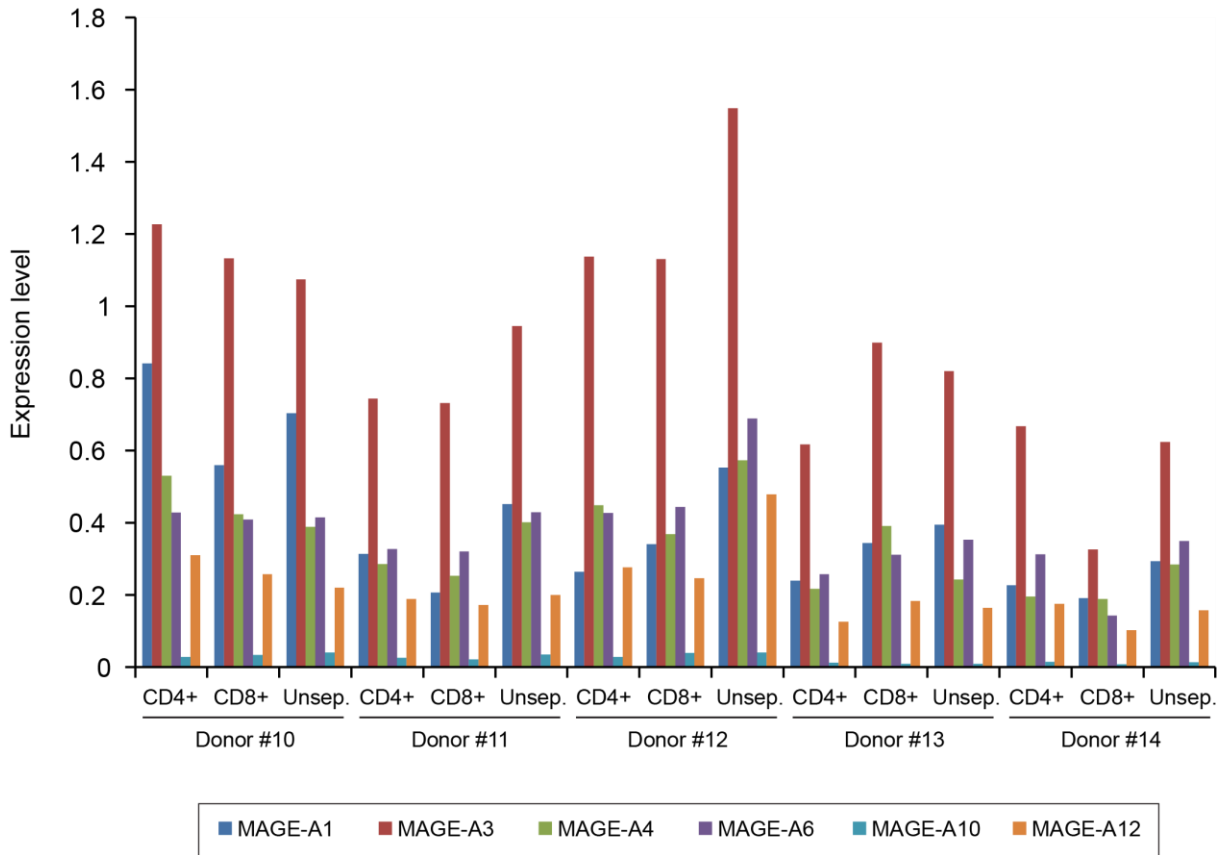

**Supplementary Figure 5. Derepression of CT antigens by 5-aza-CdR in CD4<sup>+</sup> and CD8<sup>+</sup> T cells.**

DC-activated lymphocyte cultures from three healthy donors were grown in the presence of 10  $\mu$ M 5-aza-CdR for 2 days. CD4<sup>+</sup> and CD8<sup>+</sup> cells were isolated by positive selection using human CD4 and CD8 microbeads (Miltenyi Biotec), respectively. Expression levels of CT-antigen mRNA were determined relative to GAPDH using qPCR.

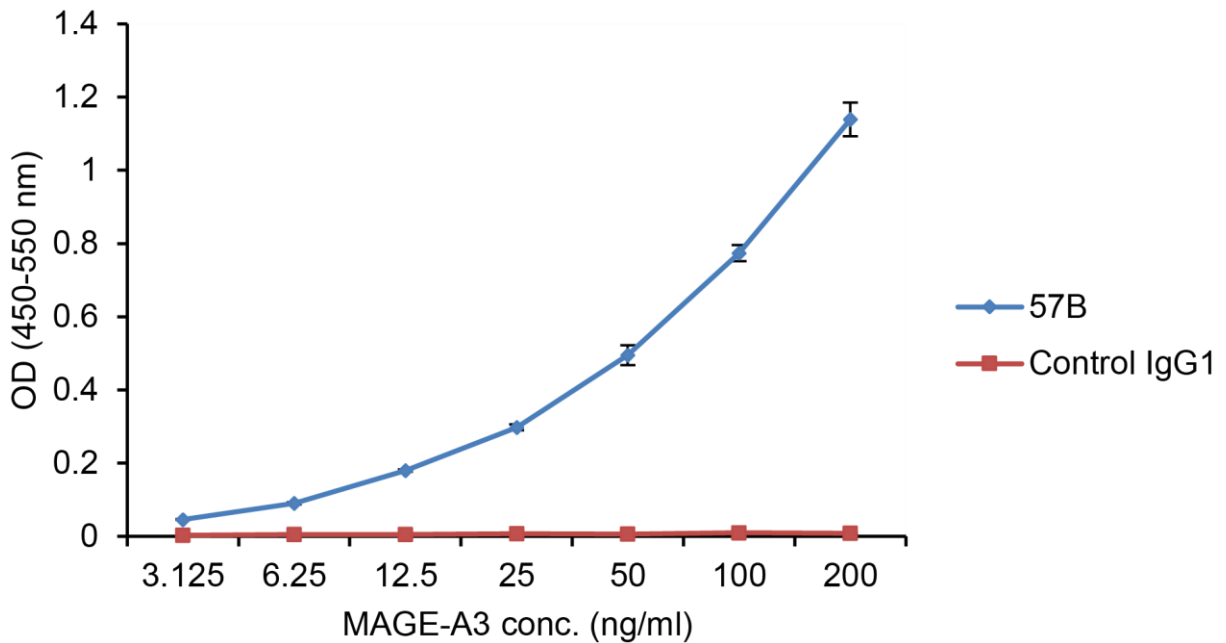

**Supplementary Figure 6. Specificity of the 57B monoclonal antibody (sandwich ELISA).** 96-well Maxisorb plates were covered with affinity-purified rabbit anti-MAGE-A3 antibody (0.6  $\mu\text{g/ml}$ ; Merck) and incubated overnight at 4°C. The plate was blocked by Assay Diluent (AD, e-Bioscience) for 2 h at room temperature and washed with phosphate buffer saline with 0.05% Tween 20 (PBS-T). Recombinant MAGE-A3 (Abcam) was applied to the wells, and after incubation for 2 h at room temperature, the wells were probed with mouse monoclonal 57B antibody or an equal amount of isotype-matched control IgG<sub>1k</sub>. After incubation with 1000-fold diluted horseradish peroxidase (HRP)-labelled rabbit anti-mouse immunoglobulins (Dako), the enzymatic colorimetric reaction with TMB substrate was performed. The reaction was terminated with 3 N sulfuric acid, and the soluble product was measured using an ELISA reader as the difference between optical density at 450 nm and 550 nm. Data represent the mean  $\pm$  s.d. of triplicate samples and are representative of two independent experiments.

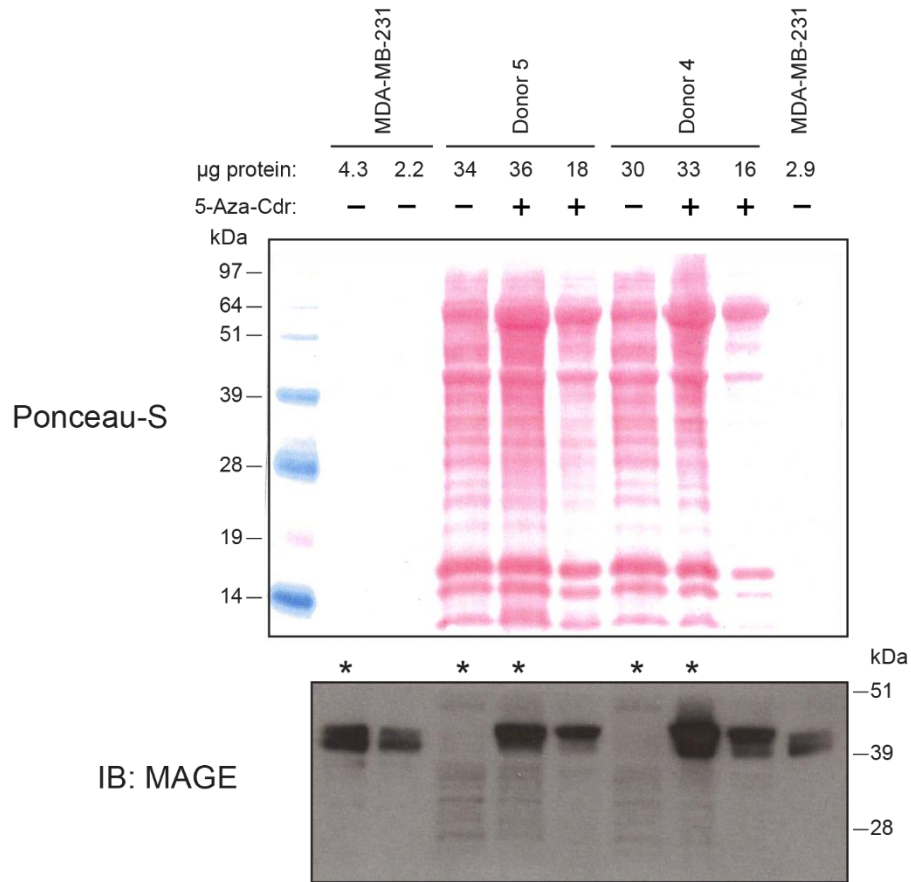

**Supplementary Figure 7. Immunoblot analysis of MAGE expression in 5-aza-CdR-treated DC-induced lymphocytes.** SDS lysates of MDA-MB-231 cells and untreated and 5-aza-CdR-treated DC-induced lymphocytes from two healthy donors were separated in a 12% Bis-Tris polyacrylamide gel, blotted and probed with the mouse monoclonal anti-MAGE antibody 57B. Note that the amount of protein analyzed was approximately 10 times higher for lymphocytes than for MDA-MB-231 cells (total protein per well is indicated above the Ponceau-S-stained blot). Lanes indicated by an asterisk are shown in Fig. 2D.

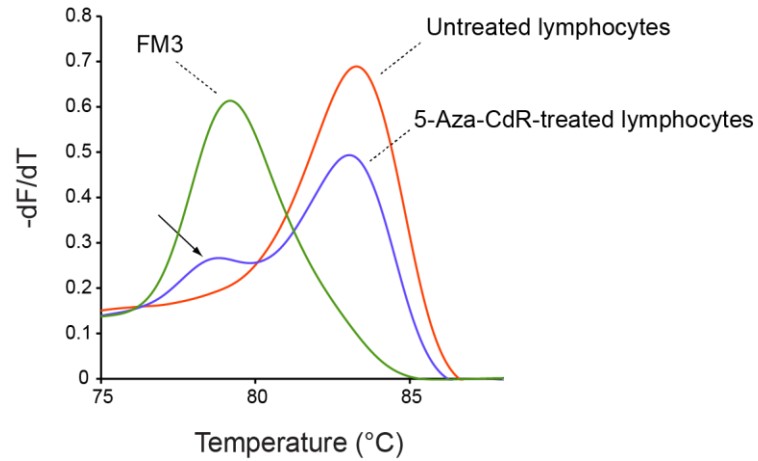

**Supplementary Figure 8. Demethylation of CT-antigen promoters in dendritic cell-induced lymphocytes.** Shown is the profiling of *MAGEA3/6* by bisulfite melting curve analysis in lymphocytes treated with 10  $\mu$ M 5-aza-CdR for 3 days. The arrow indicates hypomethylated *MAGEA3/6* alleles in 5-aza-CdR-treated lymphocytes. FM3 melanoma cells were included as a control for hypomethylation.

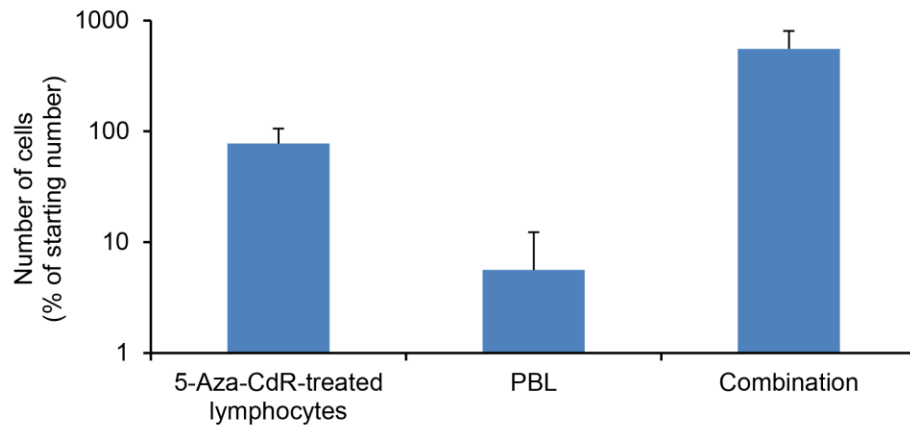

**Supplementary Figure 9. Growth of PBLs and 5-aza-Cdr-treated  $T_H$  cells cultured separately and in co-culture.** All cultures were incubated for 11 days under the same conditions with the addition of 25 IU/ml IL-2. The number of cells in the initial cultures was set at 100%. Data represent the mean  $\pm$  s.d. of four independent experiments.



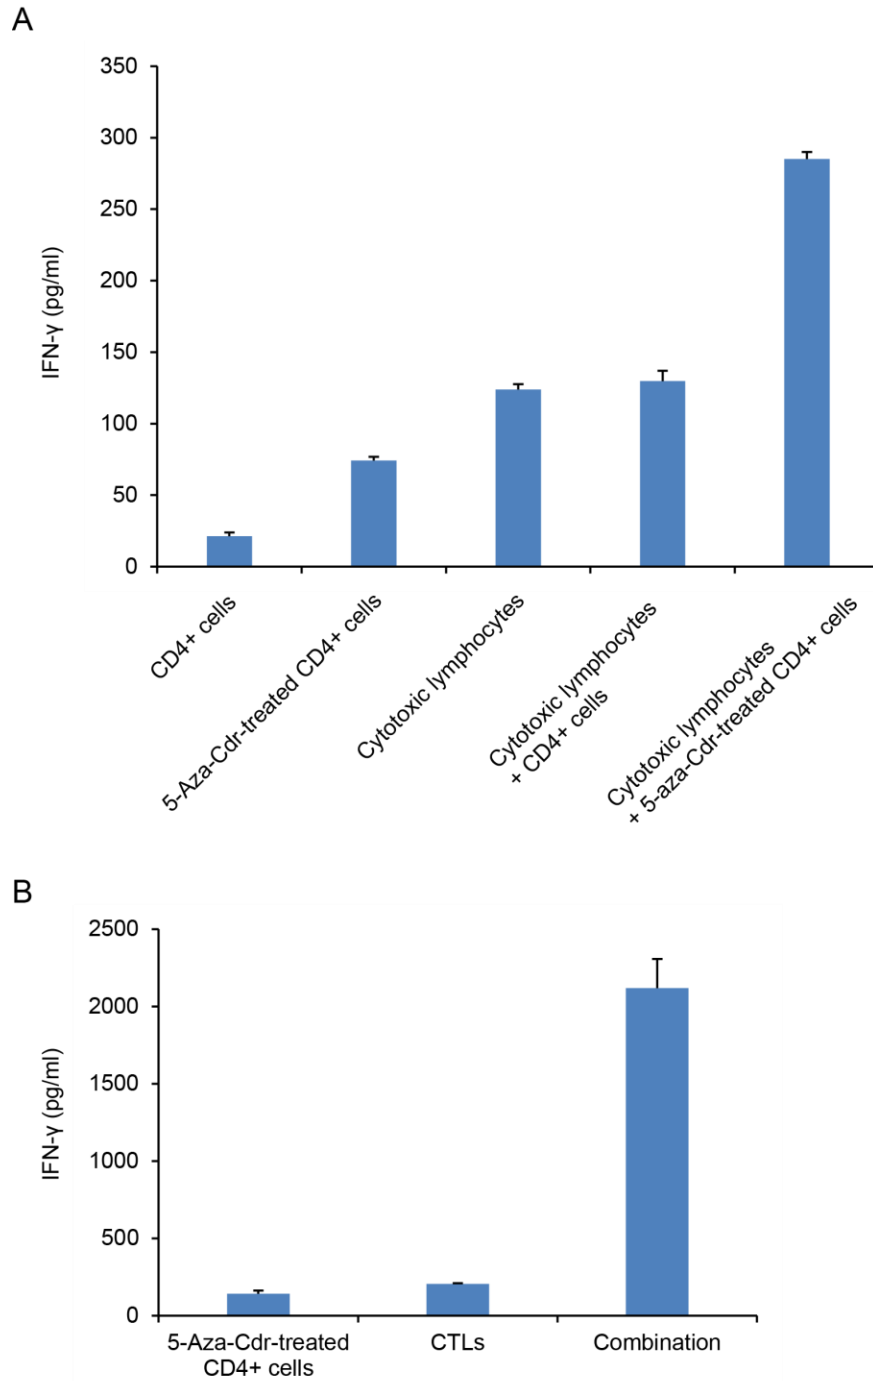

**Supplementary Figure 10. Recognition 5-aza-Cdr-treated CD4<sup>+</sup> T<sub>H</sub> cells by cytotoxic lymphocytes.** Cytotoxic lymphocytes generated by exposure to 5-aza-Cdr-treated T<sub>H</sub> cells were incubated with 5-aza-Cdr-treated or untreated CD4<sup>+</sup> T<sub>H</sub> cells for 18-20 hours. (A) Unseparated cytotoxic lymphocytes. (B) CD56-depleted lymphocytes (CTLs). A and B represent independent experiments. Data of triplicates are represented as mean ± s.d.

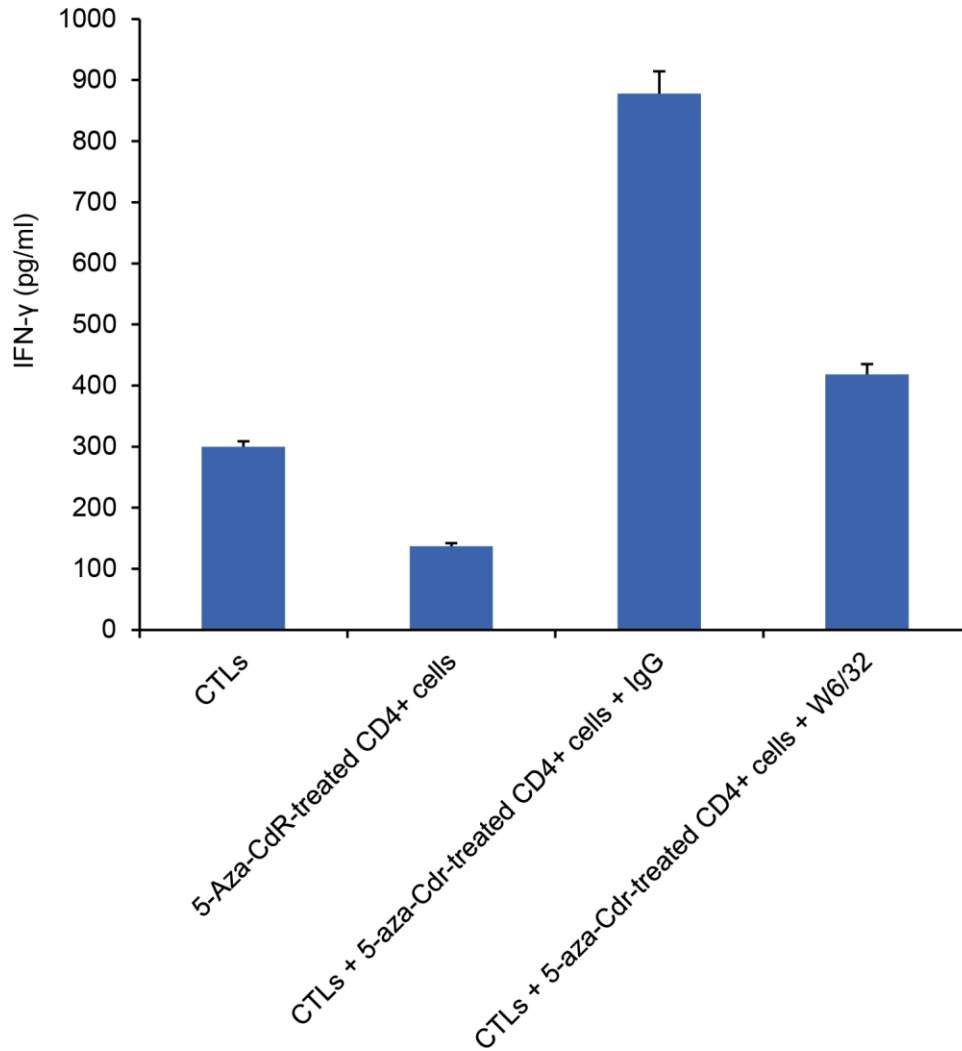

**Supplementary Figure 11. Effect of a blocking antibody to HLA class I (W6/32) on CTL recognition of 5-aza-CdR-treated T<sub>H</sub> cells.** CD56-depleted cytotoxic lymphocytes were incubated with 5-aza-CdR-treated T<sub>H</sub> cells in the presence of 10 µg/mL W6/32 or 10 µg/mL control IgG for 20 h. Data represent the mean ± s.d. of triplicate samples and are representative of three independent experiments.

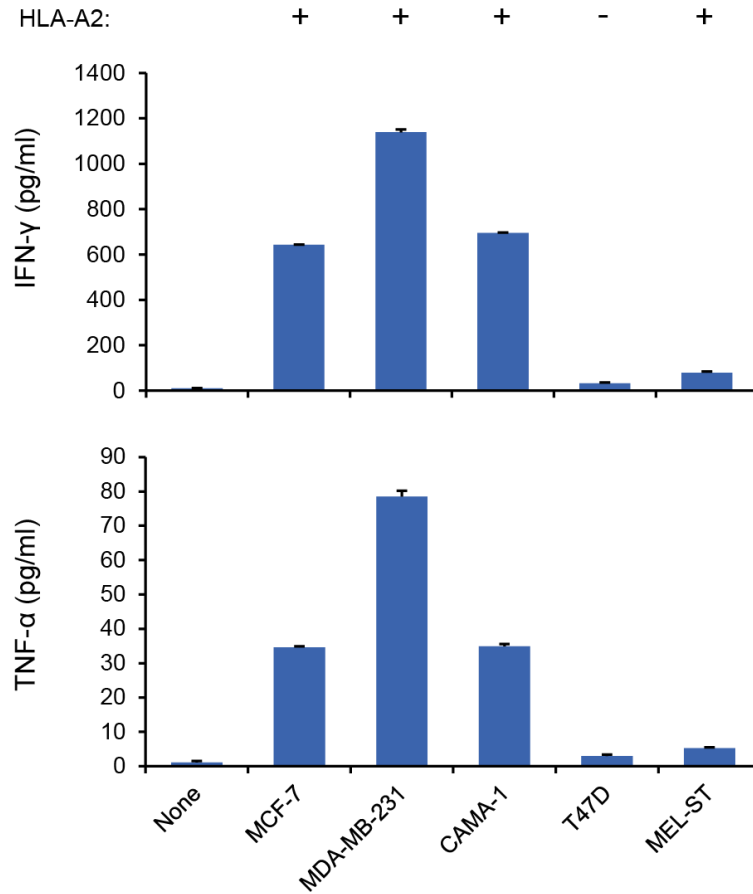

**Supplementary Figure 12. CTL-mediated recognition of breast cancer cells and immortalized melanocytes (Mel-ST).** Shown are the levels of IFN- $\gamma$  and TNF- $\alpha$  production by CD56-depleted cells from a healthy HLA-A2<sup>+</sup> donor during co-cultivation for 18-20 hours with the indicated cell lines. Data represent the mean  $\pm$  s.d. of triplicate samples and are representative of three independent experiments.

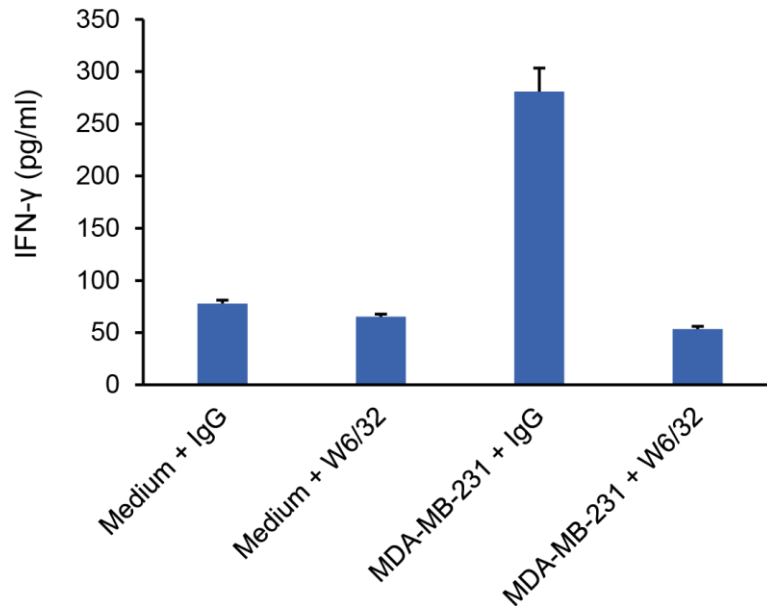

**Supplementary Figure 13. Effect of a blocking antibody to HLA class I (W6/32) on CTL recognition of MDA-MB-231 breast cancer cells.** CD56-depleted cytotoxic lymphocytes were incubated with MDA-MB-231 cells in the presence of 10  $\mu\text{g}/\text{mL}$  W6/32 or 10  $\mu\text{g}/\text{mL}$  control IgG for 20 h. Data represent the mean  $\pm$  s.d. of triplicate samples and are representative of two independent experiments.

A

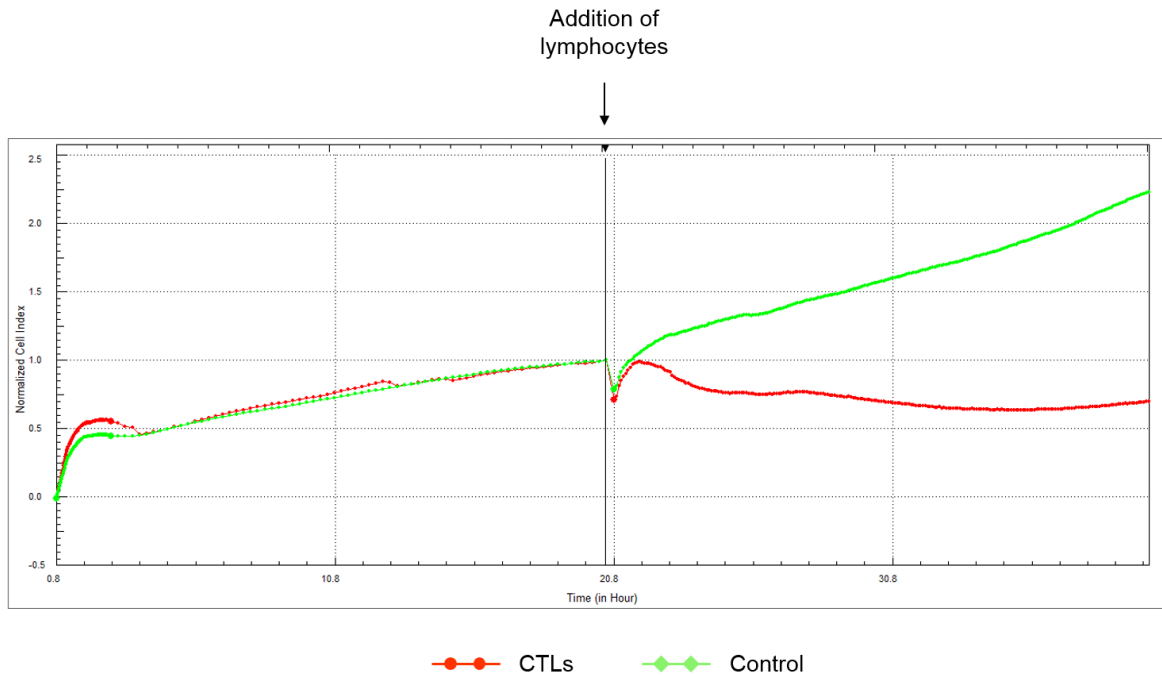

B

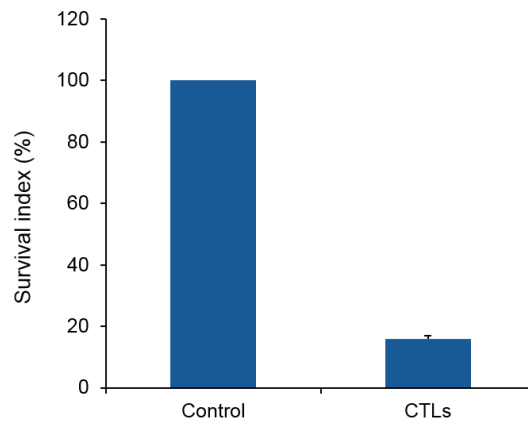

**Supplementary Figure 14. CTL-mediated lysis of MDA-MB-231 breast cancer cells.** (A) Real-time cell analysis using the iCELLigence system. MDA-MB-231 cells were seeded in L8 plates and cultured for 20 h. CTLs or medium (control) were then added, and the Cell Index was monitored for the next 20 h. (B) The same experiment showing the fraction of remaining MDA-MB-231 cells, as determined using the SRB assay.

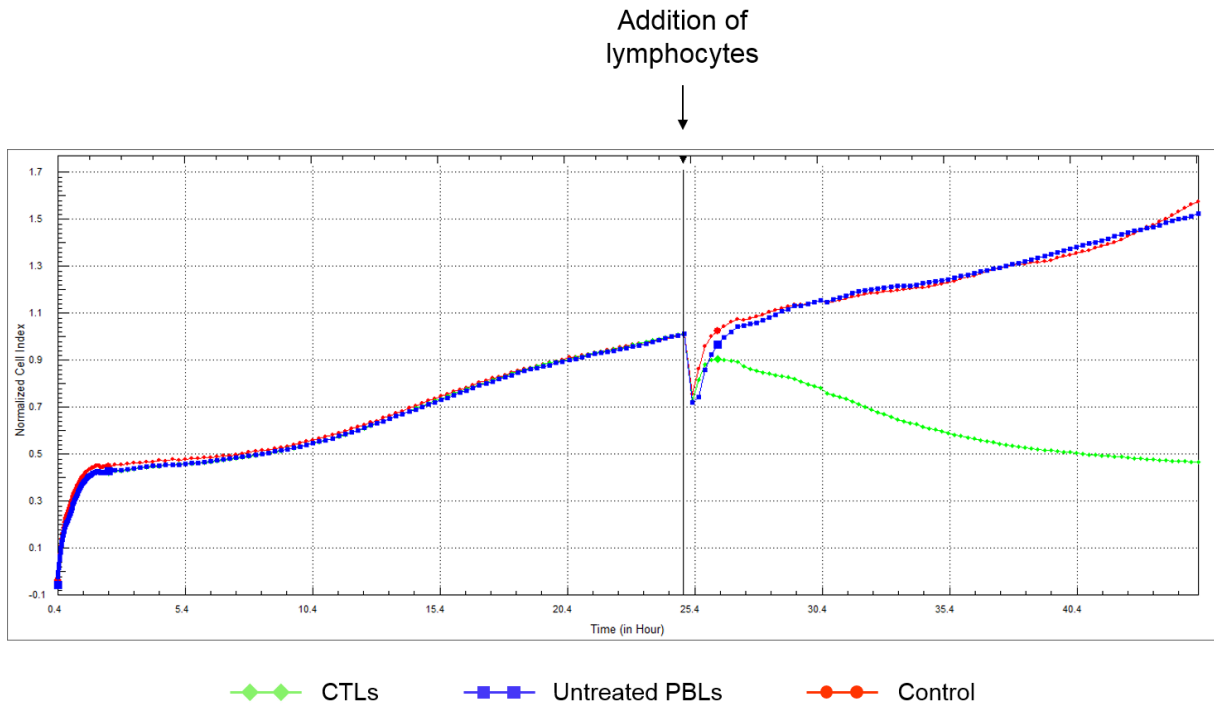

**Supplementary Figure 15. Real-time monitoring of CTL-mediated cytotoxicity.** MDA-MB-231 cells were seeded into L8 plates and cultured for 25 h. CTLs, PBLs cultured in the absence of 5-aza-Cdr-treated  $T_H$  cells, or medium (control) were added, and the Cell Index was monitored for the next 20 h, using the iCELLigence system.

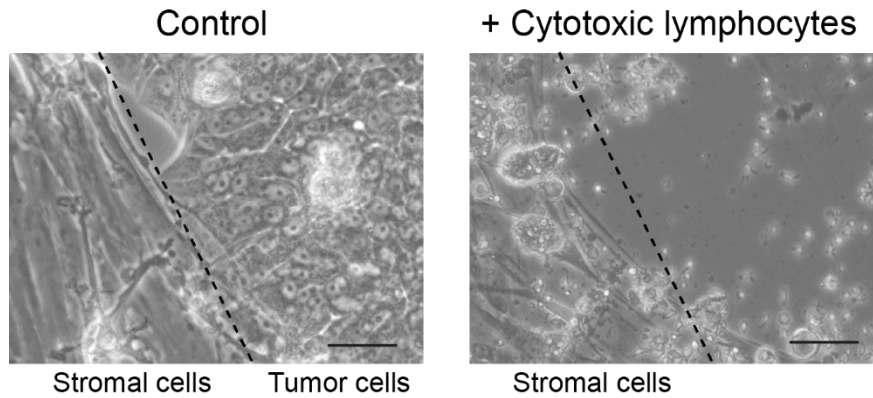

**Supplementary Figure 16. Tumor-specific cell lysis of breast cancer cells.** A cell culture containing tumor cells and stromal cells was established from biopsy material from a patient with breast cancer,  $\times 40$  objective; scale bar,  $50 \mu\text{m}$ . Tumor-specific cell lysis was observed after incubation with autologous cytotoxic lymphocytes (CD8+ and NK cells) for 3 days,  $\times 20$  objective; scale bar,  $100 \mu\text{m}$ .

Pt. 20

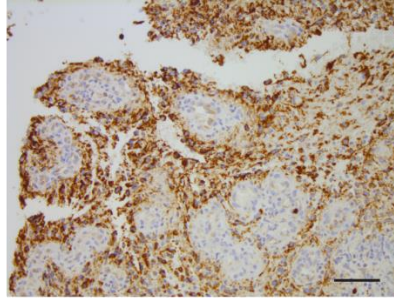

Pt. 18

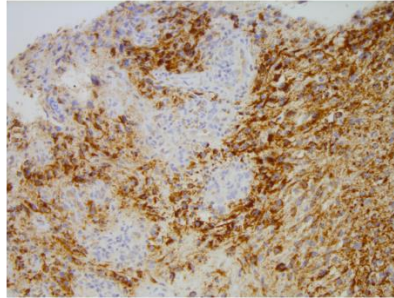

Pt. 24

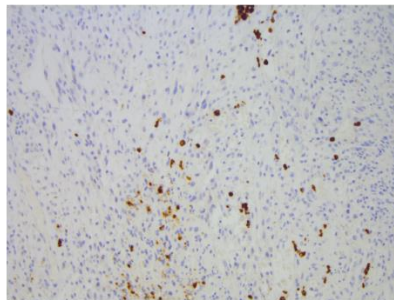

Pos. ctrl.  
(testis)

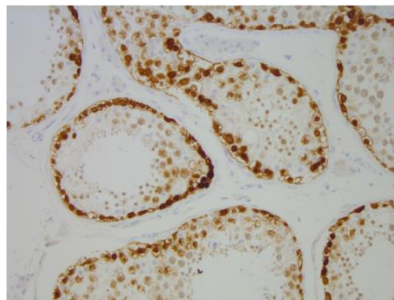

Neg. ctrl.  
(testis)

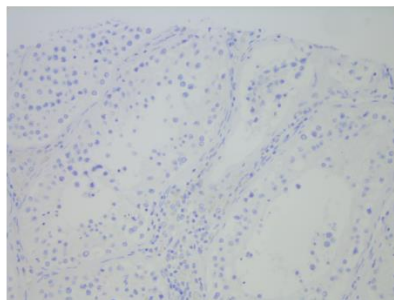

**Supplementary Figure 17. Immunohistochemical analysis of MAGE-A3 in glioblastoma biopsies at diagnosis. x 200 objective; scale bar, 50  $\mu$ m.**



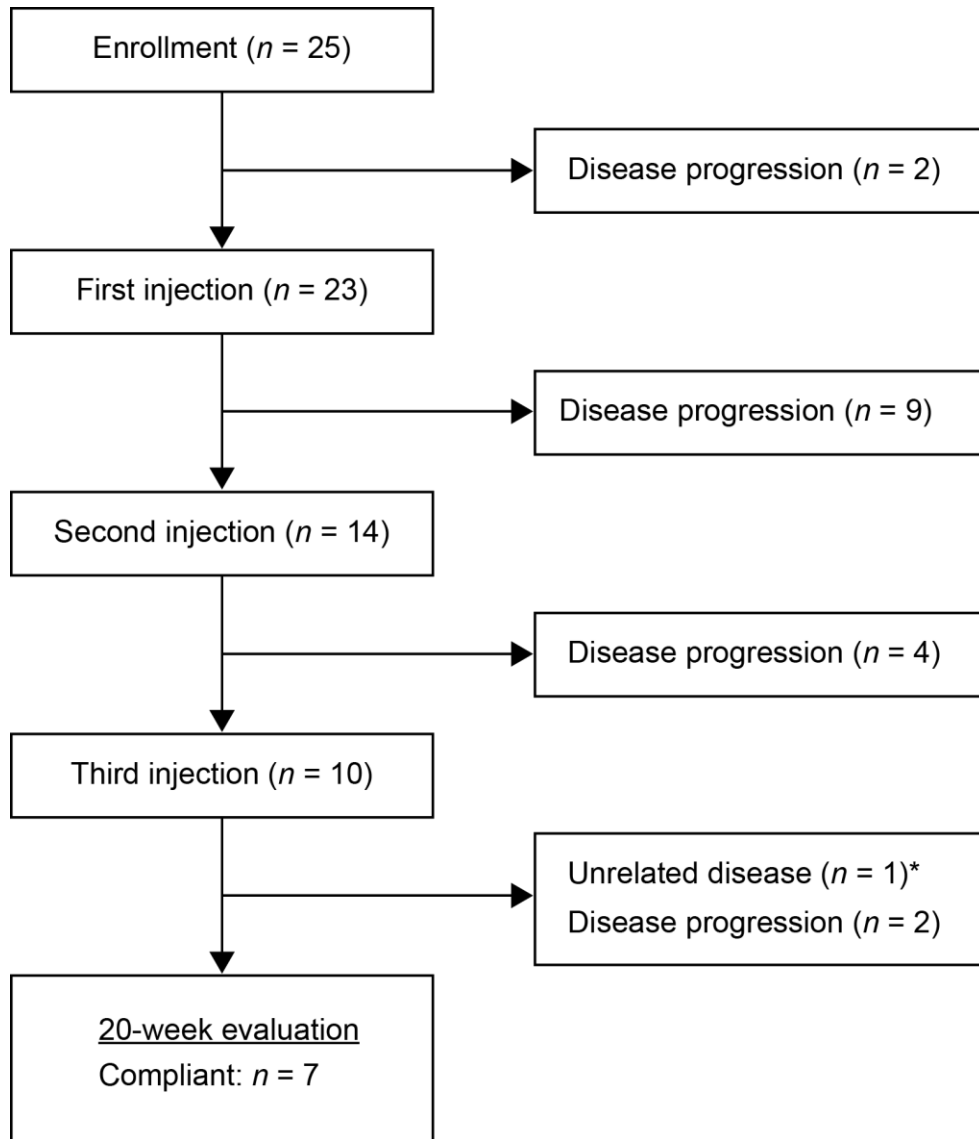

**Supplementary Figure 18. Flow diagram summarizing the trial flow and grounds for exclusion from the study.** Patients were removed from the study because of death or non-compliance (and subsequent death) due to disease progression. \*, non-compliance due to respiratory insufficiency.

A. Lymphocytes

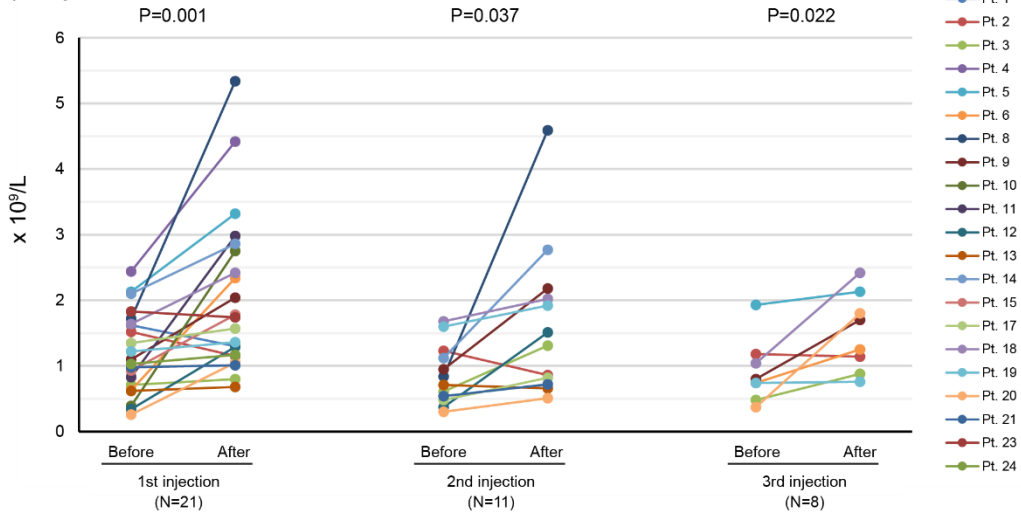

B. Leukocytes

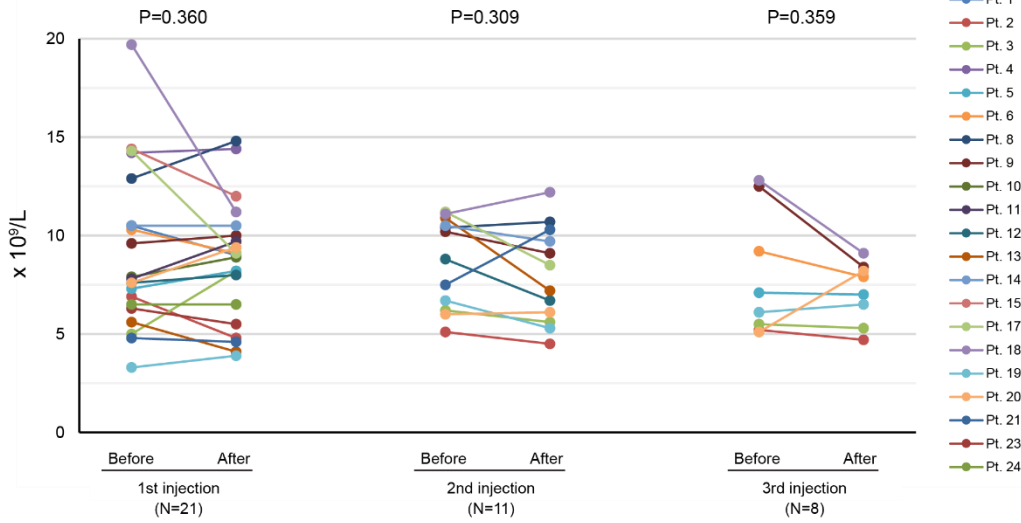

C. Neutrophils

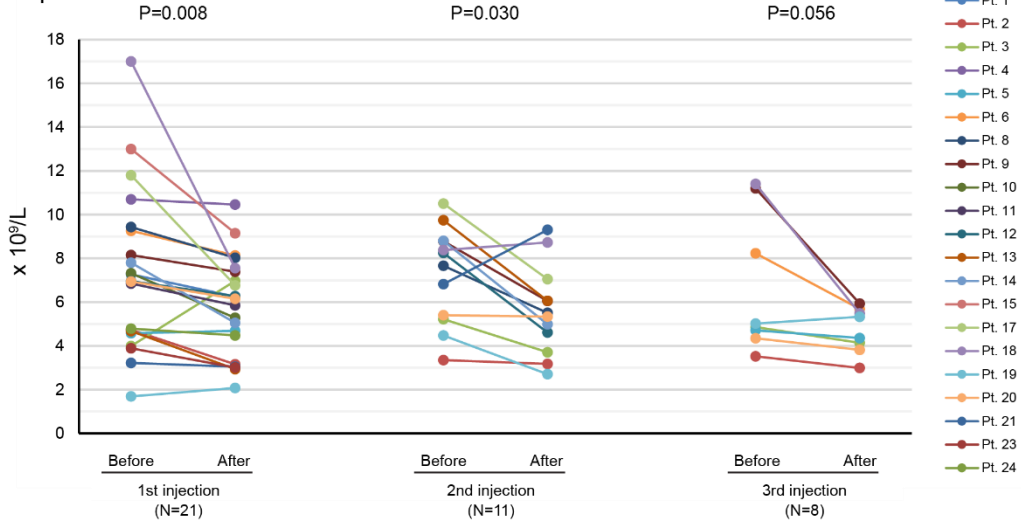

**Supplementary Figure 19. Transient changes in circulating lymphocyte, leukocyte and neutrophil counts after injection of cytotoxic lymphocytes.**

The total numbers of leukocytes, lymphocytes and neutrophils in the patients' blood were measured immediately before and 1-2 days after injection of cytotoxic lymphocytes; shown are the highest post-injection values. The increase in lymphocytes observed after each treatment cannot be explained by the number of infused cells (median  $6.8 \times 10^7$  cells per injection). The statistical comparison was performed using a paired t test.

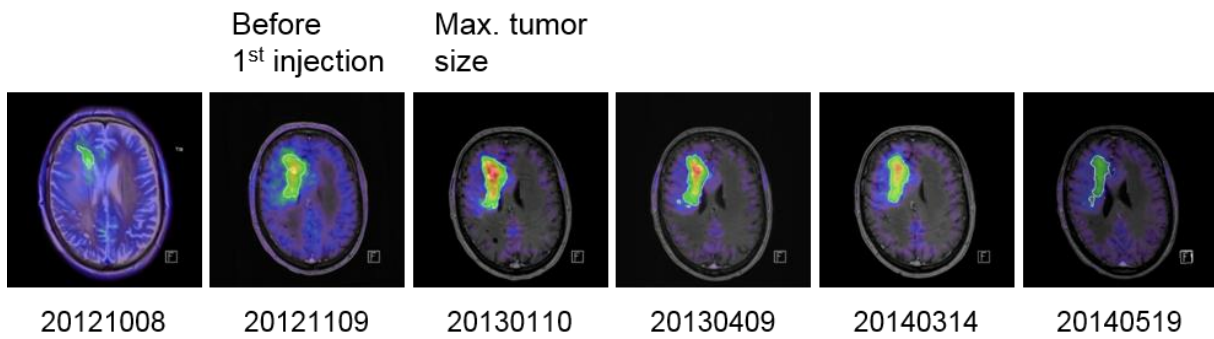

**Supplementary Figure 20. Tumor response in Patient 20.** Shown are FET-PET images and dates of analysis. Note the rapid tumor growth before treatment and the continued growth after initiation of treatment, reaching a maximum size 4-5 months after the first injection of autologous cytotoxic lymphocytes. The image at the far right shows reduced FET-PET volume more than one year after maximum.

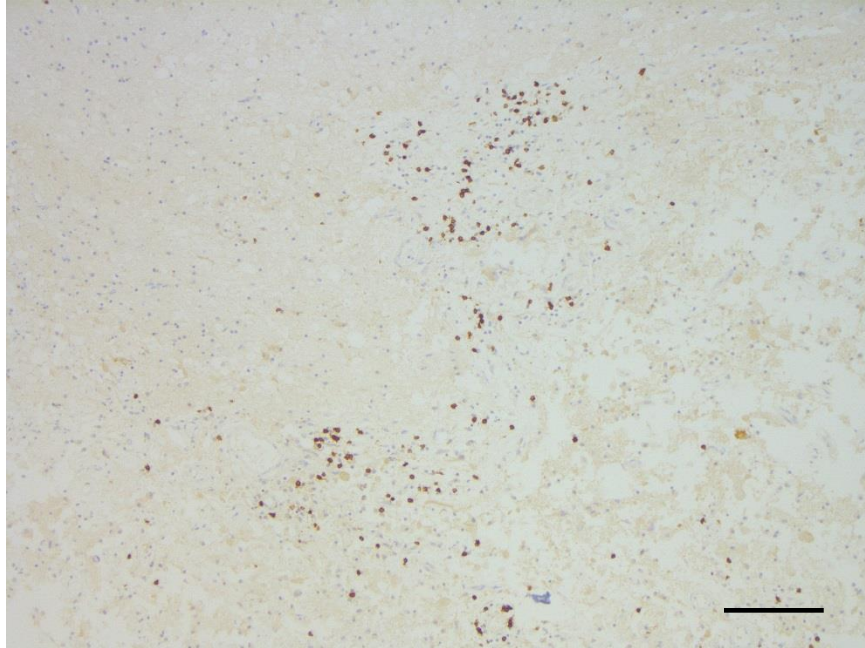

**Supplementary Figure 21. T cells at the previous tumor site in Patient 6 (autopsy material).** Shown is the immunohistochemical analysis of CD8 in the gliotic area surrounding the necrotic cavity (cf. Fig. 7), x 100 objective; scale bar, 100  $\mu$ m.

**Supplementary Table 1. Proportion of CD4<sup>+</sup> cells in non-adherent lymphocyte cultures after induction with mature DCs or PHA.**

|        | CD4 <sup>+</sup> cells (%) |       |
|--------|----------------------------|-------|
|        | DC*                        | PHA** |
| Exp. 1 | 85.1                       | 40.1  |
| Exp. 2 | 89.7                       | 31.6  |
| Exp. 3 | 81.7                       | 18.3  |

\* Cultured in the presence of mature DC for 7 days.

\*\* Cultured in the presence of PHA-L (5 µg/ml) for 5 days.

**Supplementary Table 2. Expression of selected surface markers on NK and T cells in the final product**

| Donor   | CD62L |      | $\alpha\beta$ -TcR |      | $\gamma\delta$ -TcR |      | CD45R0 |      | CD16 |     |
|---------|-------|------|--------------------|------|---------------------|------|--------|------|------|-----|
|         | NK    | T    | NK                 | T    | NK                  | T    | NK     | T    | NK   | T   |
| 11_17   | 40.8  | 47.8 | ND                 | 84.1 | ND                  | 15.9 | ND     | 96.5 | 92.7 | 7.1 |
| 13_17   | 54    | 70   | ND                 | 84.1 | ND                  | 15.9 | ND     | 90.7 | 84.6 | 9.8 |
| 16_17   | 87.7  | 86.4 | ND                 | 92.5 | ND                  | 7.5  | ND     | 97.5 | 89   | 9.4 |
| 17_17   | 76.9  | 70.9 | ND                 | 90.5 | ND                  | 9.5  | ND     | ND   | 72.3 | 6.5 |
| Average | 64.8  | 68.8 | ND                 | 87.8 | ND                  | 12.2 | ND     | 94.9 | 84.6 | 8.2 |
| SD      | 21.3  | 15.9 | ND                 | 4.3  | ND                  | 4.3  | ND     | 3.7  | 8.9  | 1.6 |

\* Expression levels represent the percentage of the gated population. ND, not determined.

**Supplementary Table 3. Stimulatory activity of CD4<sup>+</sup> and CD8<sup>+</sup> cells after treatment with 5-aza-Cdr.**

|        | CD4 <sup>+</sup> | CD8 <sup>+</sup> |
|--------|------------------|------------------|
| Exp. 1 | 270%             | 190%             |
| Exp. 2 | 403%             | 190%             |
| Exp. 3 | 798%             | 209%             |

Non-adherent lymphocytes ( $2 \times 10^6$ ) were grown in the presence of  $2 \times 10^6$  5-aza-CdR-treated CD4<sup>+</sup> or CD8<sup>+</sup> cells for 11-12 days. Shown is the increase in cell number.



**Supplementary Table 4. Lysis of MEL-ST cells expressing single CT antigens by CD56-depleted cytotoxic lymphocytes.**

| Donor | MAGE-A1 | MAGE-A3 | MAGE-A10 | GAGE12 | CTAG1 | CTCFL |
|-------|---------|---------|----------|--------|-------|-------|
| 11    | +       | -       | +        | -      | +     | -     |
| 41    | -       | -       | +/-      | -      | +     | +     |
| 42    | -       | -       | +        | -      | +     | +     |
| 37    | ND      | ND      | +        | -      | +     | +     |
| 38    | ND      | ND      | +        | -      | +     | +     |

“+” indicates decrease in survival of target cells (compared to vector control) more than 25%. “+/-” indicates decrease in survival between 15% and 25%. ND – not done.

**Supplementary Table 5. Baseline characteristics of glioblastoma patients (N = 25)**

| Pt. ID | Sex | Age | KPS | Tumor site | Primary operation | 1st line treatment | 2nd line Treatment            | No. of reoperations (before/during immunotherapy) | Time from diagnosis to enrolment (months) | No. of lymphocyte injections* | Prednisolon dose at 1st injection (mg/day) | Survival after 1st injection (days) |
|--------|-----|-----|-----|------------|-------------------|--------------------|-------------------------------|---------------------------------------------------|-------------------------------------------|-------------------------------|--------------------------------------------|-------------------------------------|
| 1      | M   | 61  | 70  | T dex      | Resection         | RT+TMZ             | BIBF 1120, BV+CPT-11          | 2/0                                               | 15                                        | 1                             | 37.5                                       | 33                                  |
| 2      | F   | 74  | 100 | F dex      | Resection         | RT+TMZ             | None                          | 2/1                                               | 8                                         | 3 (3)                         | 0                                          | 440                                 |
| 3      | M   | 75  | 100 | F bil      | Biopsy            | RT+TMZ             | None                          | 0/0                                               | 7                                         | 3 (8)                         | 37.5                                       | 717                                 |
| 4      | M   | 44  | 70  | P dex      | Resection         | RT+TMZ             | BV+CPT-11                     | 0/0                                               | 10                                        | 1                             | 37.5                                       | 39                                  |
| 5      | M   | 81  | 90  | P sin      | Resection         | RT                 | None                          | 0/0                                               | 4                                         | 3 (1)                         | 37.5                                       | 201                                 |
| 6      | F   | 63  | 60  | P sin      | Resection         | RT+TMZ             | None                          | 0/0                                               | 8                                         | 3 (5)                         | 37.5                                       | 545                                 |
| 7      | M   | 67  | 70  | FP dex     | Resection         | RT+TMZ             | BIBF 1120. BV+CPT-11          | 0/0                                               | 12                                        | 1                             | 25                                         | 7                                   |
| 8      | M   | 55  | 90  | F dex      | Resection         | RT+TMZ             | BV+ $\alpha$ -PIGF            | 3/1                                               | 23                                        | 2                             | 37.5                                       | 67                                  |
| 9      | M   | 71  | 70  | T sin      | Biopsy            | RT+TMZ             | None                          | 0/0                                               | 5                                         | 3                             | 37.5                                       | 115                                 |
| 10     | M   | 71  | 80  | F dex      | Resection         | RT+TMZ             | BV+CPT-11                     | 1/0                                               | 10                                        | 1                             | 37.5                                       | 86                                  |
| 11     | M   | 64  | 100 | F dex      | Resection         | RT+TMZ             | BV                            | 1/1                                               | 10                                        | 1                             | 0                                          | 72                                  |
| 12     | M   | 60  | 70  | T dex      | Resection         | RT+TMZ             | BV+ $\alpha$ -PIGF            | 0/0                                               | 12                                        | 2                             | 25                                         | 63                                  |
| 13     | F   | 59  | 100 | FT dex     | Resection         | RT+TMZ             | BV+CPT-11                     | 0/0                                               | 24                                        | 2                             | 25                                         | 105                                 |
| 14     | F   | 79  | 60  | F dex      | Resection         | RT+TMZ             | None                          | 0/0                                               | 15                                        | 3                             | 25                                         | 144                                 |
| 15     | M   | 56  | 90  | TP sin     | Resection         | RT+TMZ             | BV+CPT-11                     | 0/0                                               | 15                                        | 1                             | 37.5                                       | 28                                  |
| 16     | M   | 62  | 70  | T sin      | Resection         | RT+TMZ             | None                          | 0/0                                               | 10                                        | 0                             | NA                                         | NA                                  |
| 17     | M   | 64  | 60  | FT sin     | Resection         | RT+TMZ             | BV+CPT-11                     | 2/0                                               | 12                                        | 1                             | 37.5                                       | 36                                  |
| 18     | M   | 64  | 100 | T sin      | Resection         | RT+TMZ             | BV+CPT-11                     | 0/1                                               | 36                                        | 3 (2)                         | 10                                         | 267                                 |
| 19     | M   | 39  | 100 | F dex      | Resection         | RT+TMZ             | None                          | 3/0                                               | 16                                        | 3                             | 0                                          | 122                                 |
| 20     | M   | 56  | 100 | F dex      | Resection         | RT+TMZ             | BV+CPT-11                     | 0/1                                               | 14                                        | 3 (18)                        | 37.5                                       | 1384                                |
| 21     | F   | 47  | 100 | T dex      | Resection         | RT+TMZ             | BV+CPT-11                     | 0/0                                               | 31                                        | 2                             | 37.5                                       | 56                                  |
| 22     | M   | 47  | 70  | F sin      | Resection         | RT+TMZ             | BV+CPT-11                     | 1/1                                               | 31                                        | 1                             | 37.5                                       | 19                                  |
| 23     | F   | 66  | 60  | T sin      | Resection         | RT+TMZ             | BV+CPT-11                     | 0/0                                               | 23                                        | 1                             | 25                                         | 43                                  |
| 24     | M   | 65  | 90  | P dex      | Resection         | RT+TMZ             | BV+CPT-11                     | 2/1                                               | 13                                        | 3 (1)                         | 0                                          | 164                                 |
| 25     | M   | 42  | 60  | FP sin     | Resection         | RT+TMZ             | BV+CPT-11. BV+ $\alpha$ -PIGF | 3/0                                               | 36                                        | 0                             | NA                                         | NA                                  |

\*) Number in parenthesis indicates additional injections after 20-week trial. BV = bevacizumab; CPT-11 = irinotecan; TMZ = temozolomide; RT = radiation therapy;  $\alpha$ -PIGF = anti placental growth factor antibody; KPS = Karnofsky Performance Score; F = frontal; T = temporal; P = parietal; sin = sinister; dex = dexter; bil = bilateral; NA, not applicable

**Supplementary Table 6. Expression of CTCFL and MAGE-A3 in diagnostic tumor biopsies (immunohistochemical analysis)**

| <b>Patient ID</b> | <b>CTCFL</b> | <b>MAGE-A3</b> |
|-------------------|--------------|----------------|
| 2                 | +            | ++             |
| 3                 | ++           | ++++           |
| 5                 | +            | +++            |
| 6                 | 0            | +++            |
| 7                 | 0            | ++             |
| 8                 | +            | ++++           |
| 9                 | 0            | +++            |
| 10                | +            | ++++           |
| 11                | 0            | 0              |
| 12                | +++          | ++             |
| 16                | +++          | ++             |
| 17                | +++          | ++++           |
| 18                | +            | +++            |
| 19                | 0            | 0              |
| 20                | +++          | ++++           |
| 21                | +            | +++            |
| 22                | 0            | +++            |
| 23                | +            | +++            |
| 24                | ++           | ++             |
| 25                | 0            | 0              |

**Supplementary Table 7. Induction of MAGE-antigen mRNA expression by 5-aza-CdR in T<sub>H</sub> cells from patients with glioblastoma**

| Patient ID* | MAGE-A1 | MAGE-A3 | MAGE-A4 | MAGE-A6 | MAGE-A10 | MAGE-A12 |
|-------------|---------|---------|---------|---------|----------|----------|
| 2 (a)       | +       | +       | +       | +       | +        | +        |
| 2 (b)       | +       | +       | +       | +       | +        | +        |
| 2 (c)       | -       | (+)     | (+)     | -       | -        | (+)      |
| 2 (d)       | +       | +       | +       | (+)     | (+)      | +        |
| 2 (e)       | +       | +       | +       | +       | +        | +        |
| 2 (f)       | +       | +       | +       | -       | -        | +        |
| 3 (b)       | +       | +       | +       | +       | (+)      | +        |
| 3 (c)       | +       | +       | +       | +       | +        | +        |
| 3 (d)       | +       | +       | +       | +       | (+)      | +        |
| 3 (e)       | +       | +       | +       | +       | +        | +        |
| 3 (f)       | +       | +       | +       | +       | +        | +        |
| 3 (g)       | +       | +       | +       | +       | +        | +        |
| 3 (h)       | +       | +       | +       | +       | +        | +        |
| 4 (a)       | +       | +       | +       | (+)     | (+)      | +        |
| 4 (b)       | +       | +       | +       | +       | +        | +        |
| 5 (a)       | +       | (+)     | +       | -       | -        | +        |
| 5 (b)       | +       | +       | +       | +       | +        | +        |
| 5 (d)       | +       | +       | +       | +       | +        | +        |
| 6 (a)       | +       | +       | +       | +       | (+)      | +        |
| 6 (b)       | +       | +       | +       | +       | +        | +        |
| 6 (c)       | +       | +       | +       | +       | +        | +        |
| 6 (d)       | +       | +       | +       | +       | +        | +        |
| 6 (f)       | +       | +       | +       | +       | +        | +        |
| 6 (g)       | +       | +       | +       | +       | +        | +        |
| 7 (a)       | +       | +       | +       | +       | +        | +        |
| 8 (a)       | +       | +       | +       | +       | +        | +        |
| 8 (b)       | +       | +       | +       | +       | +        | +        |
| 9 (a)       | +       | +       | +       | (+)     | -        | +        |
| 9 (c)       | +       | +       | +       | +       | +        | +        |
| 9 (d)       | +       | +       | +       | +       | +        | +        |
| 11 (a)      | (+)     | (+)     | +       | -       | -        | +        |
| 11 (b)      | +       | +       | +       | +       | +        | +        |
| 12 (a)      | +       | +       | +       | +       | +        | +        |
| 12 (c)      | +       | +       | +       | +       | +        | +        |
| 13 (a)      | +       | +       | +       | +       | +        | +        |
| 13 (b)      | +       | +       | +       | +       | +        | +        |
| 14 (a)      | +       | +       | +       | +       | +        | +        |
| 14 (b)      | +       | +       | +       | +       | +        | +        |
| 14 (c)      | +       | +       | +       | +       | +        | +        |
| 15 (a)      | +       | +       | +       | +       | +        | +        |
| 16 (a)      | +       | +       | +       | +       | +        | +        |
| 18 (a)      | +       | +       | +       | (+)     | -        | +        |
| 18 (c)      | +       | -       | +       | -       | -        | +        |

|        |   |   |   |     |     |   |
|--------|---|---|---|-----|-----|---|
| 18 (d) | + | + | + | +   | +   | + |
| 18 (e) | + | + | + | +   | +   | + |
| 18 (f) | + | + | + | +   | +   | + |
| 19 (a) | + | + | + | +   | +   | + |
| 19 (b) | + | + | + | (+) | +   | + |
| 19 (c) | + | + | + | -   | (+) | + |
| 19 (d) | + | + | + | +   | +   | + |
| 20 (a) | + | + | + | +   | (+) | + |
| 20 (b) | + | + | + | -   | -   | + |
| 20 (c) | + | + | + | +   | (+) | + |
| 20 (d) | + | + | + | +   | +   | + |
| 20 (f) | + | + | + | +   | +   | + |
| 20 (j) | + | + | + | +   | +   | + |
| 20 (k) | + | + | + | +   | +   | + |
| 21 (b) | + | + | + | (+) | -   | + |
| 22 (a) | + | + | + | +   | +   | + |
| 23 (a) | + | - | + | -   | -   | + |
| 23 (b) | + | + | + | +   | +   | + |
| 24 (a) | + | + | + | +   | +   | + |
| 24 (b) | + | + | + | +   | +   | + |
| 24 (c) | + | + | + | +   | +   | + |
| 24 (d) | + | + | + | +   | +   | + |
| 25 (a) | + | + | + | +   | +   | + |

+, indicates a visible band in EtBr-stained agarose gels after 35 cycles of amplification. (+), indicates weak or inconsistent signals. \*, letters in parentheses indicate preparations from repeat blood samples from the same patient during the course of the trial.

**Supplementary Table 8. Cell therapy products administered in the phase 1 glioblastoma trial.**

| <b>Patient ID*</b> | <b>No. of cells</b> | <b>Viability (%)</b> | <b>% T cells</b> |
|--------------------|---------------------|----------------------|------------------|
| 1a                 | 176,000,000         | 93                   | 73               |
| 2a                 | 10,000,000          | 94                   | 60               |
| 2b                 | 22,000,000          | 95                   | 51               |
| 2c                 | 76,000,000          | 96                   | 55               |
| 3a                 | 100,000,000         | 98                   | 83               |
| 3b                 | 51,000,000          | 95                   | 79               |
| 3c                 | 52,500,000          | 92                   | 84               |
| 4a                 | 76,000,000          | 95                   | 79               |
| 5a                 | 5,400,000           | 96                   | 66               |
| 5b                 | 46,000,000          | 95                   | 93               |
| 5c                 | 53,000,000          | 92                   | 90               |
| 6a                 | 18,000,000          | 90                   | 70               |
| 6b                 | 10,000,000          | 95                   | 66               |
| 6c                 | 10,000,000          | 91                   | 82               |
| 7a                 | 98,500,000          | 95                   | 72               |
| 8a                 | 26,000,000          | 98                   | 96               |
| 8b                 | 20,000,000          | 98                   | 79               |
| 9a                 | 20,000,000          | 98                   | 91               |
| 9b                 | 523,000,000         | 93                   | 62               |
| 9c                 | 150,000,000         | 93                   | 91               |
| 10a                | 27,000,000          | 96                   | 68               |
| 11a                | 134,000,000         | 94                   | 22               |
| 12a                | 9,400,000           | 92                   | 80               |
| 12b                | 11,000,000          | 96                   | 75               |
| 13a                | 21,000,000          | 95                   | 40               |
| 13b                | 45,000,000          | 97                   | 46               |
| 14a                | 471,000,000         | 86                   | 8                |
| 14b                | 96,000,000          | 88                   | 16               |
| 14c                | 170,000,000         | 97                   | 22               |
| 15a                | 68,000,000          | 83                   | 27               |
| 17a                | 8,400,000           | 100                  | 51               |
| 18a                | 53,000,000          | 90                   | 38               |
| 18b                | 300,000,000         | 98                   | 17               |
| 18c                | 281,000,000         | 96                   | 33               |
| 19a                | 250,000,000         | 96                   | 67               |
| 19b                | 147,000,000         | 95                   | 71               |
| 19c                | 597,000,000         | 94                   | 77               |
| 20a                | 16,800,000          | 94                   | 70               |
| 20b                | 89,000,000          | 97                   | 73               |
| 20c                | 62,000,000          | 97                   | 61               |
| 21a                | 440,000,000         | 99                   | 91               |
| 21b                | 221,000,000         | 94                   | 91               |
| 22a                | 1,857,000,000       | 97                   | 20               |
| 23a                | 179,000,000         | 88                   | 63               |
| 24a                | 114,000,000         | 100                  | 44               |
| 24b                | 77,000,000          | 91                   | 36               |
| 24c                | 48,000,000          | 93                   | 47               |

\* Letters indicate preparations from repeat blood samples from the same patient during the course of the trial.

**Supplementary Table 9. Adverse events reported during the 20-week study period after first injection of therapeutic cells**

| <b>Adverse event<br/>(preferred terms)</b> | <b>Severity</b> | <b>Number of events</b> | <b>Patients at risk<br/>(23 treated patients)<br/>n (%)</b> |
|--------------------------------------------|-----------------|-------------------------|-------------------------------------------------------------|
| Nausea                                     | Moderate        | 4                       | 3 (13%)                                                     |
| Dizziness                                  | Moderate        | 3                       | 3 (13%)                                                     |
| Dyspnea                                    | Moderate        | 2                       | 2 (9%)                                                      |
| Pneumonia                                  | Moderate        | 2                       | 2 (9%)                                                      |
| Tiredness                                  | Moderate        | 2                       | 2 (9%)                                                      |
| Epilepsy                                   | Moderate        | 2                       | 2 (9%)                                                      |
| Aphasia                                    | Mild            | 2                       | 2 (9%)                                                      |
| Unconsciousness                            | Severe          | 1                       | 1 (4%)                                                      |
| Drop in blood pressure                     | Moderate        | 1                       | 1 (4%)                                                      |
| Back pain                                  | Moderate        | 1                       | 1 (4%)                                                      |
| Shoulder pain                              | Moderate        | 1                       | 1 (4%)                                                      |
| Impaired Vision                            | Moderate        | 1                       | 1 (4%)                                                      |
| Increased nausea                           | Moderate        | 1                       | 1 (4%)                                                      |
| Appetite loss                              | Moderate        | 1                       | 1 (4%)                                                      |
| Increased tiredness                        | Moderate        | 1                       | 1 (4%)                                                      |
| Pale                                       | Moderate        | 1                       | 1 (4%)                                                      |
| Sinus tachycardia                          | Moderate        | 1                       | 1 (4%)                                                      |
| Thrombosis leg                             | Moderate        | 1                       | 1 (4%)                                                      |
| Confusional state                          | Mild            | 1                       | 1 (4%)                                                      |
| Finger cramps                              | Mild            | 1                       | 1 (4%)                                                      |
| Leg cramp                                  | Mild            | 1                       | 1 (4%)                                                      |
| Leg pain                                   | Mild            | 1                       | 1 (4%)                                                      |

**Supplementary Table 10. Serious adverse events reported during the 20-week study period after first injection of therapeutic cells**

| SAE Term                              | SAEs total | CTCAE-grading |   |   |   |   |
|---------------------------------------|------------|---------------|---|---|---|---|
|                                       |            | 1             | 2 | 3 | 4 | 5 |
| Disease progression GBM               | 9          |               | 2 | 3 |   | 4 |
| Disease progression NOS               | 2          |               |   |   |   | 2 |
| General physical health deterioration | 2          |               |   |   | 1 | 1 |
| Neurological status deterioration     | 1          |               | 1 |   |   |   |
| Diarrhoea NOS                         | 1          |               | 1 |   |   |   |
| Seizures (incl. subtypes)             | 1          |               | 1 |   |   |   |
| Epileptic aura                        | 1          |               | 1 |   |   |   |
| Hydrocephalus                         | 1          |               | 1 |   |   |   |
| Hemiparesis                           | 1          |               | 1 |   |   |   |
| Paresis                               | 1          |               | 1 |   |   |   |
| Cerebral vascular lesion (NOS)        | 1          |               |   |   | 1 |   |
| Pneumonia                             | 1          |               |   |   | 1 |   |
| Respiratory insufficiency             | 1          |               |   |   |   | 1 |

NOS, not otherwise specified



**Supplementary Table 11. Additional injections of cytotoxic lymphocytes under approved compassionate use**

| No. Injection* | Patient ID |     |     |     |     |      |     |
|----------------|------------|-----|-----|-----|-----|------|-----|
|                | 2          | 3   | 5   | 6   | 18  | 20   | 24  |
| 4              | 154        | 154 | 154 | 168 | 175 | 140  | 105 |
| 5              | 189        | 203 |     | 238 | 203 | 175  |     |
| 6              | 231        | 238 |     | 448 |     | 217  |     |
| 7              |            | 469 |     | 483 |     | 245  |     |
| 8              |            | 525 |     | 532 |     | 287  |     |
| 9              |            | 553 |     |     |     | 350  |     |
| 10             |            | 644 |     |     |     | 392  |     |
| 11             |            | 721 |     |     |     | 434  |     |
| 12             |            |     |     |     |     | 525  |     |
| 13             |            |     |     |     |     | 574  |     |
| 14             |            |     |     |     |     | 707  |     |
| 15             |            |     |     |     |     | 763  |     |
| 16             |            |     |     |     |     | 933  |     |
| 17             |            |     |     |     |     | 1064 |     |
| 18             |            |     |     |     |     | 1162 |     |
| 19             |            |     |     |     |     | 1232 |     |
| 20             |            |     |     |     |     | 1314 |     |
| 21             |            |     |     |     |     | 1365 |     |

Numbers indicate days after 1<sup>st</sup> injection of cytotoxic lymphocytes.

\*) Additional injections were offered until death or non-compliance due to GBM progression (Pts. 2, 3, 18, 20 and 24), progression of other malignancy (Pt. 5), or death caused by an unrelated heart condition (Pt. 6).

**Supplementary Table 12. CT-antigen expression in cancer cell lines used in this study**

| Cell line  | MAGE-A1 | MAGE-A3 | MAGE-A4 | MAGE-A6 | MAGE-A10 | MAGE-A12 | GAGE-3-7 | CTCF1 | CTAG1 |
|------------|---------|---------|---------|---------|----------|----------|----------|-------|-------|
| MDA-MB-231 | +       | +       | +       | +       | -        | +        | +        | +     | -     |
| MCF-7      | +       | -       | +       | -       | -        | +        | +        | +     | -     |
| CAMA-1     | -       | +       | -       | +       | -        | +        | +        | -     | +     |
| FM3.29     | +       | +       | +       | +       | +        | +        | +        | +     | +     |
| T47D       | +       | +       | -       | +       | +        | +        | +        | -     | +     |
| U-87       | -       | +       | +       | -       | +        | +        | +        | +     | -     |
| MEL-ST     | -       | -       | -       | -       | -        | -        | -        | -     | -     |

+, indicates a visible band in EtBr-stained agarose gels after 35 (MAGE), 37 (GAGE 3-7 and CTAG1), and 40 (CTCF1) cycles of amplification.

**Supplementary Table 13. Antibodies**

| Target               | Conjugation | Catalog No. | Supplier       | Analysis | Dilution       |
|----------------------|-------------|-------------|----------------|----------|----------------|
| CTCF                 | -           | 11074-2-AP  | ProteinTech    | IHC      | 1:150          |
| MAGEA3               | -           | 60054-1-Ig  | ProteinTech    | IHC      | 1:200          |
| Ki-67                | -           | M7240       | Dako           | IHC      | 1:200          |
| p53                  | -           | 790-2912    | Ventana/Roche  | IHC      | 1:200          |
| Nestin               | -           | MAB5326     | Millipore      | IHC      | 1:800          |
| Olig2                | -           | 387M        | Cell Marque    | IHC      | 1:100          |
| MAP2                 | -           | M9942       | Sigma          | IHC      | 1:12800        |
| CD68                 | -           | M0876       | Dako           | IHC      | 1:100          |
| CD8                  | -           | 790-4460    | Ventana/Roche  | IHC      | Undiluted      |
| HLA-ABC              | -           | CLHLA-01NA  | Cedarlane      | Blocking |                |
| IgG2a                | -           | 16-4724-85  | eBioscience    | Blocking |                |
| MAGE                 | -           | Clone 57B*  | G.C. Spagnoli  | IB       | 1:15           |
|                      |             |             |                | CbELISA  | 1:10           |
|                      |             |             |                | ELISA    | 1:20           |
| IgG <sub>1</sub> , κ | -           | 554121      | BD Biosciences | CbELISA  | 1:200          |
|                      |             |             |                | ELISA    | 1:400          |
| MAGEA3               | -           | ABC468      | Merck          | ELISA    | 1:800          |
| CD3                  | FITC        | IM1281      | Beckman        | FCM      | As recommended |
| CD4                  | FITC        | 555346      | BD Biosciences | FCM      | As recommended |
| CD8                  | PE          | 555635      | BD Biosciences | FCM      | As recommended |
| CD16                 | PE-Cy5      | 555408      | BD Biosciences | FCM      | As recommended |
| CD27                 | PE          | 555441      | BD Biosciences | FCM      | As recommended |
| CD40                 | FITC        | 555588      | BD Biosciences | FCM      | As recommended |
| CD45RO               | PE          | 561889      | BD Biosciences | FCM      | As recommended |
| CD56                 | PE          | 555516      | BD Biosciences | FCM      | As recommended |
| CD62L                | PE-Cy5      | IM2655      | Beckman        | FCM      | As recommended |
| CD70                 | FITC        | 555834      | BD Biosciences | FCM      | As recommended |
| CD80                 | FITC        | 557226      | BD Biosciences | FCM      | As recommended |
| CD83                 | PE          | 556855      | BD Biosciences | FCM      | As recommended |
| CD86                 | PE          | 555658      | BD Biosciences | FCM      | As recommended |
| HLA-DR, DP, DQ       | FITC        | 555558      | BD Biosciences | FCM      | As recommended |
| MIC A/B              | PE          | 558352      | BD Biosciences | FCM      | As recommended |
| αβ-TcR               | PE          | B49177      | Beckman        | FCM      | As recommended |
| γδ-TcR               | PE          | 555717      | BD Biosciences | FCM      | As recommended |

\*, 25 µg/ml. IHC: immunohistochemistry; IB, immunoblotting; CbELISA, cell-based ELISA; FCM, flow cytometry; FITC, fluorescein isothiocyanate; PE, phycoerythrin.

**Supplementary Table 14. Primer sequences for RT-PCR**

| Gene     | Primer sequences (5'-3')                           | Length (bp) | Reference |
|----------|----------------------------------------------------|-------------|-----------|
| MAGE-A1  | GATTCCCTGGAGGCCACAG<br>CCTCACTGGGTTGCCTCTGTC       | 341         | 2         |
| MAGE-A3  | ACCAGAGGCCCGGAGGAG<br>TCCGACGACACTCCCCAGCAT        | 534         | 2         |
| MAGE-A4  | GAGCAGACAGGCCAACCG<br>AAGGACTCTGCGTCAGGC           | 446         | 3         |
| MAGE-A6  | AGGACCAGAGGCCCCC<br>GGATGATTATCAGGAAGCCTGT         | 576         |           |
| MAGE-A10 | CACAGAGCAGCACTGAAGGAG<br>CTGGGTAAAGACTCACTGTCTGG   | 485         | 3         |
| MAGE-A12 | TGGAAGTGGTCCGCATCG<br>GCCCTCCACTGATCTTTAGCAA       | 390         | 3         |
| CTAG1    | CCCACCGCTTCCCGTG<br>GGCCACTCGTGCTGGGA              | 272         | 4         |
| GAGE3-7  | GACCAAGGCGCTATGTAC<br>CCATCAGGACCATCTTCA           | 244         | 5         |
| CTCFL    | GAAAAGGCCAAATCTACAAAAATC<br>GACCCTTTGTGGCTTCCTTCAG | 1074        | 6         |
| GADPH    | AGGGGGGAGCCAAAAGGG<br>GAGGAGTGGGTGTCGCTGTTG        | 540         | 2         |

**Supplementary Table 15. Primer sequences for bisulfite pyrosequencing**

| Gene     | Primer sequences (5'-3')         | Reference |
|----------|----------------------------------|-----------|
| CTAG1    | Fw GGGGTTTTTTAGGGTAGGAAGTA       | 7         |
|          | Rev [BtN]-CCCTAAACCATCAAAAATACCA |           |
|          | Seq AGTAGGAGTTTTGAGGAT           |           |
| MAGEA1   | Fw TAATTTTGATGTTTATTYGTTTAGTTAT  | 7         |
|          | Rev [BtN]-CAAAACCTAAATCAAATTCCTT |           |
|          | Seq TTTTATTTAGGTAGGATT           |           |
| MAGEA3/6 | Fw GGTAGAATTTAGTTTTATTTTTG       |           |
|          | Rev [BtN]-ACTACAAAACCTACCTCCTCAC |           |
|          | Seq TATTTTTGTTYGGAATTTAGGGTA     |           |

**Supplementary Table 16. Primer sequences for MS-MCA**

| Gene     | Primer sequences (5'-3')                         |
|----------|--------------------------------------------------|
| MAGEA3/6 | GGTAGAATTTAGTTTTATTTTTGT<br>CTCAAAACCTTACCTCCTCA |

## Supplementary References

1. Pauleit,D. *et al.* O-(2-[18F]fluoroethyl)-L-tyrosine PET combined with MRI improves the diagnostic assessment of cerebral gliomas. *Brain* **128**, 678-687 (2005).
2. Straten,P., Kirkin,A.F., Seremet,T., & Zeuthen,J. Expression of transporter associated with antigen processing 1 and 2 (TAP1/2) in malignant melanoma cell lines. *Int. J. Cancer* **70**, 582-586 (1997).
3. De Plaen,E. *et al.* Structure, chromosomal localization, and expression of 12 genes of the MAGE family. *Immunogenetics* **40**, 360-369 (1994).
4. Lethe,B. *et al.* LAGE-1, a new gene with tumor specificity. *Int. J. Cancer* **76**, 903-908 (1998).
5. De Backer,O. *et al.* Characterization of the GAGE genes that are expressed in various human cancers and in normal testis. *Cancer Res.* **59**, 3157-3165 (1999).
6. Vatolin,S. *et al.* Conditional expression of the CTCF-paralogous transcriptional factor BORIS in normal cells results in demethylation and derepression of MAGE-A1 and reactivation of other cancer-testis genes. *Cancer Res.* **65**, 7751-7762 (2005).
7. Rao,M. *et al.* Inhibition of histone lysine methylation enhances cancer-testis antigen expression in lung cancer cells: implications for adoptive immunotherapy of cancer. *Cancer Res.* **71**, 4192-4204 (2011).
